# Supplementary material for: The effect of transformation policies on healthcare providers’ satisfaction in primary healthcare centers: the case of Eastern Saudi Arabia
Source: Springer Nature journal article supplement (doi:10.1186/s12913-023-10335-8), 2023-11-30
Supplement: MOESM2 [file 26474284]

## **Supplementary 2: Database of Healthcare providers' job satisfaction in primary healthcare centers**

This file contains individual-level datasets and a summary of agreement levels (ranging from 5 for "strongly agree" to 1 for "strongly disagree") for each question related to the study's main 11 domains. The questions were as follows:

1. I feel I am being paid a fair amount for the work I do
2. I feel satisfied with my chances for salary increases.
3. I feel satisfied with my chances for promotion.
4. I feel satisfied with the benefit package I receive. (e.g. health insurance)
5. I feel that I have open communication with my top management.
6. I feel satisfied with how often I get help and support from management.
7. I am regularly informed about important decisions, changes, and plans for the future of the PHCs in SA.
8. I feel that the work I do is appreciated.
9. I like my direct supervisor.
10. I feel my efforts are acknowledged
11. Policies and procedures in my PHC make me do my job better.
12. I feel the goals of PHC are clear to me.
13. I feel satisfied with the support I get from my coworkers/team.
14. I feel that I have to work harder to overcome the incompetency of my co-workers.
15. I feel there is too much bickering and fighting at work.
16. I feel that sometimes my job is meaningless.
17. I feel that I have too much to do at work.
18. I feel satisfied with the physical working conditions in my PHC
19. Overall I like my work
20. I feel that my job description and work tasks are clear to me.
21. I feel that I am fully responsible for my work.
22. I feel that my role in my PHC has an effect on public health prevention.
23. I feel my organization is well-equipped with necessary medical equipment.
24. I feel satisfied with the time spent with the patient during the visit
25. I feel that the patient and I have the freedom to make his/her care decisions
26. Shared-decision making is a priority for me in patient care.
27. I feel satisfied with the time I have for my social commitments
28. I would recommend employment at PHCs to my colleagues
29. Overall, I am satisfied with my employment in PHC.

| ResponseID | Fair_paid | Fair_paid_ | Salary_incr | Salary_incr | Chance_pr | Chance_pr | Benifit_ba | Benefit_pa |
|------------|-----------|------------|-------------|-------------|-----------|-----------|------------|------------|
| 102334485  | 3         | 3          | 1           | 5           | 1         | 5         | 1          | 5          |
| 102333836  | 5         | 1          | 3           | 3           | 3         | 3         | 1          | 5          |
| 102335284  | 5         | 1          | 5           | 1           | 5         | 1         | 1          | 5          |
| 102335616  | 1         | 5          | 1           | 5           | 1         | 5         | 1          | 5          |
| 103111695  | 2         | 4          | 2           | 4           | 3         | 3         | 2          | 4          |
| 103111712  | 2         | 4          | 1           | 5           | 4         | 2         | 1          | 5          |
| 103608743  | 4         | 2          | 4           | 2           | 4         | 2         | 2          | 4          |
| 103612209  | 2         | 4          | 2           | 4           | 1         | 5         | 2          | 4          |
| 103774944  | 4         | 2          | 3           | 3           | 3         | 3         | 2          | 4          |
| 103774985  | 2         | 4          | 3           | 3           | 3         | 3         | 3          | 3          |
| 103775094  | 3         | 3          | 3           | 3           | 3         | 3         | 4          | 2          |
| 103839209  | 3         | 3          | 3           | 3           | 2         | 4         | 2          | 4          |
| 103840221  | 3         | 3          | 3           | 3           | 3         | 3         | 2          | 4          |
| 104711072  | 4         | 2          | 4           | 2           | 4         | 2         | 5          | 1          |
| 105021185  | 3         | 3          | 4           | 2           | 4         | 2         | 2          | 4          |
| 105022028  | 2         | 4          | 4           | 2           | 3         | 3         | 4          | 2          |
| 105123427  | 1         | 5          | 2           | 4           | 3         | 3         | 1          | 5          |
| 105123593  | 3         | 3          | 2           | 4           | 2         | 4         | 2          | 4          |
| 105021851  | 2         | 4          | 2           | 4           | 2         | 4         | 2          | 4          |
| 104994850  | 4         | 2          | 4           | 2           | 5         | 1         | 5          | 1          |
| 102332615  | 2         | 4          | 3           | 3           | 3         | 3         | 2          | 4          |
| 102332821  | 2         | 4          | 3           | 3           | 4         | 2         | 2          | 4          |
| 103774198  | 1         | 5          | 4           | 2           | 3         | 3         | 1          | 5          |
| 103775020  | 2         | 4          | 1           | 5           | 2         | 4         | 2          | 4          |
| 103775097  | 5         | 1          | 4           | 2           | 4         | 2         | 4          | 2          |
| 103838903  | 2         | 4          | 2           | 4           | 2         | 4         | 2          | 4          |
| 103839803  | 3         | 3          | 5           | 1           | 5         | 1         | 5          | 1          |
| 103840295  | 5         | 1          | 5           | 1           | 5         | 1         | 1          | 5          |
| 103840379  | 3         | 3          | 5           | 1           | 5         | 1         | 3          | 3          |
| 103854842  | 3         | 3          | 4           | 2           | 4         | 2         | 2          | 4          |
| 104611172  | 2         | 4          | 3           | 3           | 3         | 3         | 2          | 4          |
| 104986449  | 2         | 4          | 3           | 3           | 2         | 4         | 2          | 4          |
| 104991362  | 4         | 2          | 4           | 2           | 4         | 2         | 3          | 3          |
| 104994284  | 3         | 3          | 3           | 3           | 2         | 4         | 2          | 4          |
| 105020222  | 4         | 2          | 5           | 1           | 5         | 1         | 3          | 3          |
| 105020383  | 2         | 4          | 4           | 2           | 4         | 2         | 1          | 5          |
| 105021126  | 2         | 4          | 3           | 3           | 3         | 3         | 2          | 4          |
| 105021177  | 5         | 1          | 4           | 2           | 2         | 4         | 3          | 3          |
| 105021281  | 2         | 4          | 2           | 4           | 2         | 4         | 2          | 4          |
| 105021334  | 2         | 4          | 1           | 5           | 1         | 5         | 1          | 5          |
| 105022210  | 2         | 4          | 2           | 4           | 2         | 4         | 2          | 4          |
| 105031981  | 2         | 4          | 2           | 4           | 3         | 3         | 1          | 5          |
| 105184089  | 2         | 4          | 2           | 4           | 2         | 4         | 2          | 4          |
| 105249126  | 2         | 4          | 3           | 3           | 4         | 2         | 2          | 4          |
| 105251530  | 5         | 1          | 4           | 2           | 3         | 3         | 4          | 2          |
| 105252492  | 2         | 4          | 5           | 1           | 3         | 3         | 2          | 4          |
| 105253385  | 4         | 2          | 3           | 3           | 3         | 3         | 3          | 3          |
| 105258597  | 5         | 1          | 2           | 4           | 5         | 1         | 1          | 5          |
| 102332214  | 2         | 4          | 3           | 3           | 2         | 4         | 2          | 4          |

|           |   |   |   |   |   |   |   |   |
|-----------|---|---|---|---|---|---|---|---|
| 102335694 | 3 | 3 | 4 | 2 | 4 | 2 | 3 | 3 |
| 104984903 | 2 | 4 | 3 | 3 | 3 | 3 | 2 | 4 |
| 105023734 | 2 | 4 | 3 | 3 | 4 | 2 | 2 | 4 |
| 105123302 | 2 | 4 | 2 | 4 | 2 | 4 | 2 | 4 |
| 105123774 | 3 | 3 | 3 | 3 | 4 | 2 | 1 | 5 |
| 105152699 | 4 | 2 | 4 | 2 | 4 | 2 | 2 | 4 |
| 105250107 | 4 | 2 | 5 | 1 | 4 | 2 | 5 | 1 |
| 105251014 | 5 | 1 | 4 | 2 | 4 | 2 | 4 | 2 |
| 104985420 | 3 | 3 | 1 | 5 | 1 | 5 | 1 | 5 |
| 102334856 | 1 | 5 | 1 | 5 | 1 | 5 | 1 | 5 |
| 103111795 | 2 | 4 | 2 | 4 | 3 | 3 | 2 | 4 |
| 102422528 | 5 | 1 | 5 | 1 | 5 | 1 | 4 | 2 |
| 103773475 | 3 | 3 | 3 | 3 | 1 | 5 | 3 | 3 |
| 105020842 | 4 | 2 | 2 | 4 | 2 | 4 | 2 | 4 |
| 105021246 | 4 | 2 | 5 | 1 | 3 | 3 | 5 | 1 |
| 105021926 | 2 | 4 | 3 | 3 | 5 | 1 | 5 | 1 |
| 105021984 | 3 | 3 | 3 | 3 | 3 | 3 | 3 | 3 |
| 105022119 | 3 | 3 | 3 | 3 | 3 | 3 | 3 | 3 |
| 105026687 | 2 | 4 | 2 | 4 | 2 | 4 | 2 | 4 |
| 105021556 | 3 | 3 | 2 | 4 | 3 | 3 | 4 | 2 |
| 102480197 | 3 | 3 | 3 | 3 | 3 | 3 | 4 | 2 |
| 102788147 | 4 | 2 | 2 | 4 | 1 | 5 | 1 | 5 |
| 103773458 | 3 | 3 | 3 | 3 | 3 | 3 | 3 | 3 |
| 103774017 | 4 | 2 | 3 | 3 | 2 | 4 | 2 | 4 |
| 103774065 | 2 | 4 | 3 | 3 | 3 | 3 | 3 | 3 |
| 103775026 | 3 | 3 | 3 | 3 | 2 | 4 | 3 | 3 |
| 104987072 | 3 | 3 | 2 | 4 | 4 | 2 | 5 | 1 |
| 104987637 | 5 | 1 | 5 | 1 | 2 | 4 | 5 | 1 |
| 104989206 | 3 | 3 | 4 | 2 | 2 | 4 | 5 | 1 |
| 104989207 | 4 | 2 | 2 | 4 | 1 | 5 | 1 | 5 |
| 105019523 | 4 | 2 | 2 | 4 | 2 | 4 | 4 | 2 |
| 105020094 | 4 | 2 | 4 | 2 | 4 | 2 | 5 | 1 |
| 105020140 | 2 | 4 | 1 | 5 | 1 | 5 | 1 | 5 |
| 105020202 | 2 | 4 | 1 | 5 | 2 | 4 | 4 | 2 |
| 105020308 | 3 | 3 | 2 | 4 | 2 | 4 | 2 | 4 |
| 105020721 | 3 | 3 | 1 | 5 | 1 | 5 | 1 | 5 |
| 105021504 | 2 | 4 | 4 | 2 | 4 | 2 | 5 | 1 |
| 105021869 | 2 | 4 | 2 | 4 | 2 | 4 | 4 | 2 |
| 105022078 | 3 | 3 | 2 | 4 | 3 | 3 | 3 | 3 |
| 105022183 | 4 | 2 | 3 | 3 | 2 | 4 | 5 | 1 |
| 105025427 | 3 | 3 | 2 | 4 | 2 | 4 | 5 | 1 |
| 105025560 | 2 | 4 | 2 | 4 | 2 | 4 | 5 | 1 |
| 105030621 | 2 | 4 | 2 | 4 | 2 | 4 | 5 | 1 |
| 105123819 | 4 | 2 | 4 | 2 | 2 | 4 | 1 | 5 |
| 105153197 | 4 | 2 | 2 | 4 | 2 | 4 | 5 | 1 |
| 105214326 | 3 | 3 | 1 | 5 | 1 | 5 | 5 | 1 |
| 105214457 | 1 | 5 | 1 | 5 | 1 | 5 | 1 | 5 |
| 105249133 | 5 | 1 | 5 | 1 | 4 | 2 | 5 | 1 |
| 105249298 | 2 | 4 | 3 | 3 | 3 | 3 | 5 | 1 |
| 105250395 | 2 | 4 | 2 | 4 | 3 | 3 | 4 | 2 |

|           |   |   |   |   |   |   |   |   |
|-----------|---|---|---|---|---|---|---|---|
| 105251194 | 4 | 2 | 4 | 2 | 4 | 2 | 4 | 2 |
| 105251516 | 4 | 2 | 4 | 2 | 4 | 2 | 5 | 1 |
| 105251882 | 2 | 4 | 2 | 4 | 4 | 2 | 5 | 1 |
| 105252047 | 2 | 4 | 4 | 2 | 4 | 2 | 4 | 2 |
| 105024326 | 2 | 4 | 2 | 4 | 2 | 4 | 5 | 1 |
| 103773075 | 2 | 4 | 2 | 4 | 4 | 2 | 5 | 1 |
| 102346665 | 2 | 4 | 2 | 4 | 2 | 4 | 2 | 4 |
| 103774016 | 3 | 3 | 3 | 3 | 3 | 3 | 3 | 3 |
| 104985652 | 4 | 2 | 4 | 2 | 4 | 2 | 5 | 1 |
| 104985812 | 2 | 4 | 2 | 4 | 2 | 4 | 5 | 1 |
| 104988625 | 4 | 2 | 2 | 4 | 2 | 4 | 2 | 4 |
| 105019417 | 4 | 2 | 1 | 5 | 1 | 5 | 4 | 2 |
| 105020524 | 3 | 3 | 4 | 2 | 4 | 2 | 4 | 2 |
| 105127068 | 2 | 4 | 2 | 4 | 2 | 4 | 5 | 1 |
| 105131564 | 3 | 3 | 2 | 4 | 2 | 4 | 5 | 1 |
| 102358824 | 3 | 3 | 2 | 4 | 2 | 4 | 2 | 4 |
| 102357992 | 1 | 5 | 1 | 5 | 1 | 5 | 1 | 5 |
| 104987473 | 4 | 2 | 2 | 4 | 2 | 4 | 4 | 2 |
| 102378993 | 2 | 4 | 2 | 4 | 3 | 3 | 4 | 2 |
| 102379239 | 3 | 3 | 2 | 4 | 4 | 2 | 4 | 2 |
| 105122262 | 4 | 2 | 4 | 2 | 4 | 2 | 5 | 1 |
| 105263379 | 2 | 4 | 3 | 3 | 3 | 3 | 5 | 1 |
| 103629908 | 5 | 1 | 4 | 2 | 4 | 2 | 2 | 4 |
| 105214826 | 2 | 4 | 2 | 4 | 4 | 2 | 4 | 2 |
| 103608770 | 4 | 2 | 1 | 5 | 3 | 3 | 4 | 2 |
| 104985561 | 2 | 4 | 1 | 5 | 1 | 5 | 1 | 5 |
| 103773703 | 3 | 3 | 3 | 3 | 3 | 3 | 1 | 5 |
| 103838737 | 3 | 3 | 4 | 2 | 3 | 3 | 3 | 3 |
| 105252197 | 2 | 4 | 2 | 4 | 4 | 2 | 4 | 2 |
| 105214959 | 3 | 3 | 3 | 3 | 3 | 3 | 3 | 3 |
| 104985127 | 2 | 4 | 2 | 4 | 2 | 4 | 3 | 3 |
| 105249467 | 5 | 1 | 5 | 1 | 5 | 1 | 5 | 1 |
| 105214475 | 5 | 1 | 4 | 2 | 5 | 1 | 5 | 1 |
| 105214991 | 2 | 4 | 4 | 2 | 4 | 2 | 4 | 2 |
| 105249130 | 4 | 2 | 2 | 4 | 2 | 4 | 1 | 5 |
| 105251665 | 2 | 4 | 4 | 2 | 4 | 2 | 5 | 1 |
| 105561007 | 4 | 2 | 4 | 2 | 4 | 2 | 4 | 2 |
| 105249163 | 3 | 3 | 3 | 3 | 4 | 2 | 3 | 3 |
| 105249960 | 2 | 4 | 2 | 4 | 2 | 4 | 3 | 3 |
| 105253865 | 3 | 3 | 3 | 3 | 4 | 2 | 4 | 2 |
| 105253658 | 4 | 2 | 4 | 2 | 4 | 2 | 4 | 2 |
| 105412749 | 4 | 2 | 5 | 1 | 4 | 2 | 5 | 1 |
| 103774515 | 2 | 4 | 1 | 5 | 4 | 2 | 3 | 3 |
| 105024472 | 2 | 4 | 4 | 2 | 4 | 2 | 5 | 1 |

| Communic | Communic | Help_supp | Help_supp | Informed_ | Informed_ | Work_app | Work_app | Direct_sup |
|----------|----------|-----------|-----------|-----------|-----------|----------|----------|------------|
| 2        | 4        | 2         | 4         | 3         | 3         | 2        | 4        | 2          |
| 1        | 5        | 2         | 4         | 2         | 4         | 2        | 4        | 1          |
| 4        | 2        | 4         | 2         | 2         | 4         | 5        | 1        | 5          |
| 3        | 3        | 2         | 4         | 1         | 5         | 1        | 5        | 1          |
| 3        | 3        | 3         | 3         | 4         | 2         | 3        | 3        | 2          |
| 4        | 2        | 3         | 3         | 5         | 1         | 4        | 2        | 2          |
| 2        | 4        | 2         | 4         | 5         | 1         | 3        | 3        | 1          |
| 2        | 4        | 1         | 5         | 1         | 5         | 2        | 4        | 2          |
| 2        | 4        | 2         | 4         | 2         | 4         | 2        | 4        | 2          |
| 2        | 4        | 2         | 4         | 2         | 4         | 2        | 4        | 2          |
| 1        | 5        | 1         | 5         | 3         | 3         | 2        | 4        | 1          |
| 2        | 4        | 2         | 4         | 3         | 3         | 3        | 3        | 3          |
| 4        | 2        | 2         | 4         | 4         | 2         | 2        | 4        | 3          |
| 4        | 2        | 3         | 3         | 4         | 2         | 3        | 3        | 4          |
| 3        | 3        | 3         | 3         | 4         | 2         | 2        | 4        | 3          |
| 2        | 4        | 3         | 3         | 3         | 3         | 3        | 3        | 2          |
| 4        | 2        | 3         | 3         | 3         | 3         | 3        | 3        | 2          |
| 2        | 4        | 3         | 3         | 3         | 3         | 2        | 4        | 2          |
| 3        | 3        | 3         | 3         | 4         | 2         | 4        | 2        | 2          |
| 5        | 1        | 5         | 1         | 4         | 2         | 5        | 1        | 5          |
| 3        | 3        | 2         | 4         | 3         | 3         | 3        | 3        | 2          |
| 3        | 3        | 4         | 2         | 2         | 4         | 4        | 2        | 2          |
| 3        | 3        | 2         | 4         | 4         | 2         | 2        | 4        | 1          |
| 2        | 4        | 2         | 4         | 2         | 4         | 2        | 4        | 2          |
| 4        | 2        | 4         | 2         | 3         | 3         | 3        | 3        | 4          |
| 2        | 4        | 3         | 3         | 3         | 3         | 3        | 3        | 1          |
| 5        | 1        | 5         | 1         | 3         | 3         | 4        | 2        | 2          |
| 5        | 1        | 5         | 1         | 3         | 3         | 3        | 3        | 5          |
| 3        | 3        | 3         | 3         | 4         | 2         | 3        | 3        | 1          |
| 3        | 3        | 3         | 3         | 4         | 2         | 4        | 2        | 2          |
| 1        | 5        | 2         | 4         | 2         | 4         | 2        | 4        | 1          |
| 3        | 3        | 4         | 2         | 4         | 2         | 4        | 2        | 2          |
| 5        | 1        | 4         | 2         | 4         | 2         | 5        | 1        | 4          |
| 2        | 4        | 4         | 2         | 4         | 2         | 2        | 4        | 3          |
| 4        | 2        | 2         | 4         | 2         | 4         | 3        | 3        | 1          |
| 2        | 4        | 2         | 4         | 4         | 2         | 3        | 3        | 2          |
| 3        | 3        | 3         | 3         | 4         | 2         | 3        | 3        | 1          |
| 2        | 4        | 2         | 4         | 2         | 4         | 4        | 2        | 1          |
| 1        | 5        | 1         | 5         | 2         | 4         | 1        | 5        | 1          |
| 2        | 4        | 1         | 5         | 2         | 4         | 2        | 4        | 1          |
| 2        | 4        | 2         | 4         | 1         | 5         | 1        | 5        | 1          |
| 3        | 3        | 3         | 3         | 3         | 3         | 1        | 5        | 2          |
| 2        | 4        | 2         | 4         | 2         | 4         | 2        | 4        | 2          |
| 3        | 3        | 2         | 4         | 2         | 4         | 2        | 4        | 2          |
| 4        | 2        | 4         | 2         | 4         | 2         | 2        | 4        | 4          |
| 5        | 1        | 5         | 1         | 4         | 2         | 5        | 1        | 1          |
| 5        | 1        | 5         | 1         | 3         | 3         | 5        | 1        | 2          |
| 4        | 2        | 2         | 4         | 2         | 4         | 3        | 3        | 1          |
| 5        | 1        | 5         | 1         | 2         | 4         | 2        | 4        | 4          |

|   |   |   |   |   |   |   |   |   |
|---|---|---|---|---|---|---|---|---|
| 5 | 1 | 5 | 1 | 5 | 1 | 5 | 1 | 5 |
| 2 | 4 | 2 | 4 | 2 | 4 | 2 | 4 | 1 |
| 3 | 3 | 3 | 3 | 2 | 4 | 4 | 2 | 4 |
| 3 | 3 | 3 | 3 | 5 | 1 | 3 | 3 | 3 |
| 2 | 4 | 2 | 4 | 2 | 4 | 2 | 4 | 2 |
| 4 | 2 | 4 | 2 | 4 | 2 | 4 | 2 | 4 |
| 3 | 3 | 3 | 3 | 4 | 2 | 3 | 3 | 3 |
| 3 | 3 | 3 | 3 | 4 | 2 | 2 | 4 | 2 |
| 2 | 4 | 3 | 3 | 1 | 5 | 2 | 4 | 1 |
| 1 | 5 | 1 | 5 | 1 | 5 | 1 | 5 | 1 |
| 3 | 3 | 3 | 3 | 4 | 2 | 4 | 2 | 2 |
| 5 | 1 | 5 | 1 | 1 | 5 | 4 | 2 | 5 |
| 1 | 5 | 1 | 5 | 1 | 5 | 3 | 3 | 1 |
| 3 | 3 | 3 | 3 | 3 | 3 | 5 | 1 | 5 |
| 3 | 3 | 2 | 4 | 2 | 4 | 3 | 3 | 2 |
| 1 | 5 | 3 | 3 | 2 | 4 | 2 | 4 | 1 |
| 3 | 3 | 3 | 3 | 3 | 3 | 3 | 3 | 3 |
| 2 | 4 | 2 | 4 | 3 | 3 | 4 | 2 | 2 |
| 2 | 4 | 2 | 4 | 2 | 4 | 2 | 4 | 2 |
| 2 | 4 | 2 | 4 | 3 | 3 | 3 | 3 | 2 |
| 2 | 4 | 2 | 4 | 2 | 4 | 2 | 4 | 1 |
| 3 | 3 | 2 | 4 | 2 | 4 | 2 | 4 | 2 |
| 3 | 3 | 3 | 3 | 3 | 3 | 3 | 3 | 1 |
| 2 | 4 | 2 | 4 | 2 | 4 | 2 | 4 | 2 |
| 3 | 3 | 4 | 2 | 2 | 4 | 1 | 5 | 5 |
| 3 | 3 | 3 | 3 | 2 | 4 | 3 | 3 | 2 |
| 5 | 1 | 5 | 1 | 4 | 2 | 4 | 2 | 4 |
| 4 | 2 | 3 | 3 | 4 | 2 | 3 | 3 | 2 |
| 2 | 4 | 2 | 4 | 4 | 2 | 2 | 4 | 1 |
| 3 | 3 | 3 | 3 | 1 | 5 | 3 | 3 | 1 |
| 2 | 4 | 4 | 2 | 5 | 1 | 4 | 2 | 2 |
| 4 | 2 | 2 | 4 | 2 | 4 | 2 | 4 | 1 |
| 2 | 4 | 1 | 5 | 1 | 5 | 2 | 4 | 1 |
| 2 | 4 | 4 | 2 | 2 | 4 | 2 | 4 | 2 |
| 3 | 3 | 2 | 4 | 2 | 4 | 3 | 3 | 2 |
| 2 | 4 | 2 | 4 | 3 | 3 | 3 | 3 | 1 |
| 4 | 2 | 4 | 2 | 2 | 4 | 4 | 2 | 2 |
| 3 | 3 | 3 | 3 | 3 | 3 | 4 | 2 | 2 |
| 3 | 3 | 3 | 3 | 3 | 3 | 4 | 2 | 2 |
| 5 | 1 | 5 | 1 | 3 | 3 | 3 | 3 | 5 |
| 4 | 2 | 4 | 2 | 4 | 2 | 2 | 4 | 3 |
| 2 | 4 | 3 | 3 | 3 | 3 | 3 | 3 | 2 |
| 4 | 2 | 3 | 3 | 3 | 3 | 3 | 3 | 2 |
| 3 | 3 | 3 | 3 | 4 | 2 | 4 | 2 | 3 |
| 2 | 4 | 2 | 4 | 2 | 4 | 2 | 4 | 2 |
| 5 | 1 | 4 | 2 | 5 | 1 | 5 | 1 | 1 |
| 3 | 3 | 3 | 3 | 3 | 3 | 2 | 4 | 4 |
| 4 | 2 | 4 | 2 | 4 | 2 | 4 | 2 | 2 |
| 4 | 2 | 4 | 2 | 4 | 2 | 5 | 1 | 3 |
| 5 | 1 | 5 | 1 | 2 | 4 | 5 | 1 | 3 |

|   |   |   |   |   |   |   |   |   |
|---|---|---|---|---|---|---|---|---|
| 4 | 2 | 3 | 3 | 3 | 3 | 3 | 3 | 1 |
| 3 | 3 | 2 | 4 | 3 | 3 | 3 | 3 | 2 |
| 4 | 2 | 4 | 2 | 4 | 2 | 4 | 2 | 4 |
| 4 | 2 | 4 | 2 | 4 | 2 | 2 | 4 | 2 |
| 3 | 3 | 2 | 4 | 4 | 2 | 1 | 5 | 1 |
| 2 | 4 | 2 | 4 | 2 | 4 | 2 | 4 | 2 |
| 2 | 4 | 2 | 4 | 3 | 3 | 3 | 3 | 1 |
| 3 | 3 | 3 | 3 | 3 | 3 | 3 | 3 | 1 |
| 3 | 3 | 3 | 3 | 3 | 3 | 3 | 3 | 1 |
| 5 | 1 | 3 | 3 | 3 | 3 | 3 | 3 | 4 |
| 2 | 4 | 2 | 4 | 2 | 4 | 2 | 4 | 2 |
| 1 | 5 | 1 | 5 | 1 | 5 | 2 | 4 | 2 |
| 3 | 3 | 2 | 4 | 4 | 2 | 2 | 4 | 2 |
| 4 | 2 | 4 | 2 | 2 | 4 | 3 | 3 | 1 |
| 4 | 2 | 3 | 3 | 3 | 3 | 2 | 4 | 1 |
| 3 | 3 | 3 | 3 | 4 | 2 | 3 | 3 | 3 |
| 1 | 5 | 1 | 5 | 1 | 5 | 1 | 5 | 1 |
| 2 | 4 | 2 | 4 | 5 | 1 | 2 | 4 | 1 |
| 5 | 1 | 4 | 2 | 4 | 2 | 5 | 1 | 5 |
| 4 | 2 | 4 | 2 | 3 | 3 | 3 | 3 | 3 |
| 5 | 1 | 5 | 1 | 5 | 1 | 5 | 1 | 3 |
| 3 | 3 | 2 | 4 | 4 | 2 | 3 | 3 | 3 |
| 3 | 3 | 3 | 3 | 3 | 3 | 4 | 2 | 2 |
| 3 | 3 | 2 | 4 | 4 | 2 | 2 | 4 | 1 |
| 2 | 4 | 1 | 5 | 1 | 5 | 1 | 5 | 1 |
| 3 | 3 | 3 | 3 | 2 | 4 | 4 | 2 | 4 |
| 3 | 3 | 3 | 3 | 3 | 3 | 3 | 3 | 1 |
| 3 | 3 | 3 | 3 | 2 | 4 | 3 | 3 | 2 |
| 2 | 4 | 5 | 1 | 5 | 1 | 5 | 1 | 2 |
| 2 | 4 | 2 | 4 | 2 | 4 | 2 | 4 | 2 |
| 1 | 5 | 1 | 5 | 2 | 4 | 1 | 5 | 1 |
| 5 | 1 | 5 | 1 | 5 | 1 | 5 | 1 | 3 |
| 2 | 4 | 2 | 4 | 4 | 2 | 2 | 4 | 1 |
| 1 | 5 | 2 | 4 | 3 | 3 | 2 | 4 | 2 |
| 4 | 2 | 2 | 4 | 2 | 4 | 1 | 5 | 1 |
| 4 | 2 | 4 | 2 | 4 | 2 | 4 | 2 | 2 |
| 4 | 2 | 4 | 2 | 4 | 2 | 4 | 2 | 4 |
| 3 | 3 | 1 | 5 | 2 | 4 | 2 | 4 | 1 |
| 3 | 3 | 2 | 4 | 1 | 5 | 2 | 4 | 2 |
| 4 | 2 | 5 | 1 | 4 | 2 | 5 | 1 | 3 |
| 5 | 1 | 5 | 1 | 2 | 4 | 4 | 2 | 3 |
| 5 | 1 | 5 | 1 | 5 | 1 | 2 | 4 | 2 |
| 2 | 4 | 1 | 5 | 1 | 5 | 2 | 4 | 2 |
| 4 | 2 | 3 | 3 | 4 | 2 | 5 | 1 | 3 |

| Direct_sup | Effort_ackr | Effort_ackr | Policies_pr | Policies_pr | Goal_clear | Goal_clear | Support_cc | Support_cc |
|------------|-------------|-------------|-------------|-------------|------------|------------|------------|------------|
| 4          | 2           | 4           | 2           | 4           | 2          | 4          | 2          | 4          |
| 5          | 3           | 3           | 3           | 3           | 3          | 3          | 2          | 4          |
| 1          | 4           | 2           | 5           | 1           | 3          | 3          | 1          | 5          |
| 5          | 1           | 5           | 1           | 5           | 1          | 5          | 1          | 5          |
| 4          | 2           | 4           | 2           | 4           | 2          | 4          | 1          | 5          |
| 4          | 4           | 2           | 1           | 5           | 4          | 2          | 3          | 3          |
| 5          | 2           | 4           | 4           | 2           | 4          | 2          | 3          | 3          |
| 4          | 2           | 4           | 3           | 3           | 3          | 3          | 2          | 4          |
| 4          | 2           | 4           | 2           | 4           | 2          | 4          | 2          | 4          |
| 4          | 2           | 4           | 3           | 3           | 3          | 3          | 2          | 4          |
| 5          | 2           | 4           | 3           | 3           | 3          | 3          | 1          | 5          |
| 3          | 2           | 4           | 3           | 3           | 1          | 5          | 1          | 5          |
| 3          | 3           | 3           | 4           | 2           | 4          | 2          | 2          | 4          |
| 2          | 5           | 1           | 4           | 2           | 4          | 2          | 2          | 4          |
| 3          | 2           | 4           | 2           | 4           | 3          | 3          | 2          | 4          |
| 4          | 2           | 4           | 2           | 4           | 2          | 4          | 2          | 4          |
| 4          | 3           | 3           | 3           | 3           | 3          | 3          | 4          | 2          |
| 4          | 2           | 4           | 2           | 4           | 2          | 4          | 3          | 3          |
| 4          | 3           | 3           | 3           | 3           | 3          | 3          | 2          | 4          |
| 1          | 5           | 1           | 5           | 1           | 5          | 1          | 5          | 1          |
| 4          | 2           | 4           | 2           | 4           | 2          | 4          | 2          | 4          |
| 4          | 2           | 4           | 4           | 2           | 4          | 2          | 2          | 4          |
| 5          | 2           | 4           | 4           | 2           | 1          | 5          | 1          | 5          |
| 4          | 3           | 3           | 3           | 3           | 3          | 3          | 3          | 3          |
| 2          | 3           | 3           | 4           | 2           | 5          | 1          | 3          | 3          |
| 5          | 2           | 4           | 3           | 3           | 3          | 3          | 2          | 4          |
| 4          | 3           | 3           | 5           | 1           | 3          | 3          | 2          | 4          |
| 1          | 5           | 1           | 5           | 1           | 5          | 1          | 1          | 5          |
| 5          | 3           | 3           | 4           | 2           | 2          | 4          | 2          | 4          |
| 4          | 3           | 3           | 3           | 3           | 3          | 3          | 3          | 3          |
| 5          | 2           | 4           | 2           | 4           | 2          | 4          | 2          | 4          |
| 4          | 3           | 3           | 2           | 4           | 2          | 4          | 2          | 4          |
| 2          | 4           | 2           | 4           | 2           | 4          | 2          | 3          | 3          |
| 3          | 4           | 2           | 5           | 1           | 4          | 2          | 2          | 4          |
| 5          | 3           | 3           | 2           | 4           | 3          | 3          | 1          | 5          |
| 4          | 4           | 2           | 3           | 3           | 3          | 3          | 2          | 4          |
| 5          | 3           | 3           | 4           | 2           | 4          | 2          | 2          | 4          |
| 5          | 2           | 4           | 5           | 1           | 3          | 3          | 1          | 5          |
| 5          | 1           | 5           | 1           | 5           | 1          | 5          | 1          | 5          |
| 5          | 2           | 4           | 3           | 3           | 4          | 2          | 1          | 5          |
| 5          | 2           | 4           | 1           | 5           | 1          | 5          | 1          | 5          |
| 4          | 1           | 5           | 4           | 2           | 2          | 4          | 1          | 5          |
| 4          | 2           | 4           | 2           | 4           | 2          | 4          | 2          | 4          |
| 4          | 3           | 3           | 3           | 3           | 3          | 3          | 2          | 4          |
| 2          | 4           | 2           | 4           | 2           | 4          | 2          | 2          | 4          |
| 5          | 5           | 1           | 5           | 1           | 3          | 3          | 1          | 5          |
| 4          | 5           | 1           | 5           | 1           | 4          | 2          | 3          | 3          |
| 5          | 4           | 2           | 5           | 1           | 4          | 2          | 4          | 2          |
| 2          | 4           | 2           | 4           | 2           | 4          | 2          | 2          | 4          |



|   |   |   |   |   |   |   |   |   |
|---|---|---|---|---|---|---|---|---|
| 1 | 5 | 1 | 5 | 1 | 5 | 1 | 4 | 2 |
| 5 | 2 | 4 | 2 | 4 | 2 | 4 | 2 | 4 |
| 2 | 4 | 2 | 4 | 2 | 2 | 4 | 3 | 3 |
| 3 | 3 | 3 | 4 | 2 | 4 | 2 | 2 | 4 |
| 4 | 2 | 4 | 1 | 5 | 2 | 4 | 2 | 4 |
| 2 | 4 | 2 | 3 | 3 | 4 | 2 | 4 | 2 |
| 3 | 4 | 2 | 4 | 2 | 4 | 2 | 2 | 4 |
| 4 | 3 | 3 | 3 | 3 | 4 | 2 | 2 | 4 |
| 5 | 2 | 4 | 2 | 4 | 1 | 5 | 1 | 5 |
| 5 | 1 | 5 | 1 | 5 | 1 | 5 | 1 | 5 |
| 4 | 3 | 3 | 3 | 3 | 4 | 2 | 2 | 4 |
| 1 | 5 | 1 | 5 | 1 | 2 | 4 | 2 | 4 |
| 5 | 1 | 5 | 1 | 5 | 3 | 3 | 1 | 5 |
| 1 | 3 | 3 | 3 | 3 | 3 | 3 | 4 | 2 |
| 4 | 4 | 2 | 2 | 4 | 3 | 3 | 3 | 3 |
| 5 | 2 | 4 | 2 | 4 | 4 | 2 | 2 | 4 |
| 3 | 3 | 3 | 3 | 3 | 3 | 3 | 3 | 3 |
| 4 | 3 | 3 | 3 | 3 | 2 | 4 | 2 | 4 |
| 4 | 2 | 4 | 2 | 4 | 2 | 4 | 2 | 4 |
| 4 | 3 | 3 | 3 | 3 | 2 | 4 | 2 | 4 |
| 5 | 1 | 5 | 1 | 5 | 1 | 5 | 1 | 5 |
| 4 | 1 | 5 | 3 | 3 | 2 | 4 | 3 | 3 |
| 5 | 3 | 3 | 3 | 3 | 3 | 3 | 1 | 5 |
| 4 | 2 | 4 | 2 | 4 | 2 | 4 | 2 | 4 |
| 1 | 2 | 4 | 5 | 1 | 3 | 3 | 4 | 2 |
| 4 | 1 | 5 | 1 | 5 | 3 | 3 | 1 | 5 |
| 2 | 4 | 2 | 2 | 4 | 3 | 3 | 5 | 1 |
| 4 | 2 | 4 | 3 | 3 | 3 | 3 | 1 | 5 |
| 5 | 2 | 4 | 2 | 4 | 2 | 4 | 2 | 4 |
| 5 | 3 | 3 | 3 | 3 | 3 | 3 | 2 | 4 |
| 4 | 5 | 1 | 4 | 2 | 2 | 4 | 2 | 4 |
| 5 | 2 | 4 | 4 | 2 | 2 | 4 | 2 | 4 |
| 5 | 1 | 5 | 1 | 5 | 1 | 5 | 1 | 5 |
| 4 | 3 | 3 | 4 | 2 | 4 | 2 | 2 | 4 |
| 4 | 3 | 3 | 2 | 4 | 2 | 4 | 2 | 4 |
| 5 | 4 | 2 | 3 | 3 | 2 | 4 | 2 | 4 |
| 4 | 3 | 3 | 4 | 2 | 3 | 3 | 3 | 3 |
| 4 | 3 | 3 | 3 | 3 | 4 | 2 | 4 | 2 |
| 4 | 3 | 3 | 3 | 3 | 3 | 3 | 3 | 3 |
| 1 | 4 | 2 | 4 | 2 | 3 | 3 | 3 | 3 |
| 3 | 4 | 2 | 4 | 2 | 4 | 2 | 3 | 3 |
| 4 | 2 | 4 | 3 | 3 | 2 | 4 | 3 | 3 |
| 4 | 4 | 2 | 2 | 4 | 2 | 4 | 3 | 3 |
| 3 | 4 | 2 | 2 | 4 | 2 | 4 | 2 | 4 |
| 4 | 2 | 4 | 2 | 4 | 2 | 4 | 2 | 4 |
| 5 | 3 | 3 | 4 | 2 | 4 | 2 | 4 | 2 |
| 2 | 1 | 5 | 3 | 3 | 3 | 3 | 3 | 3 |
| 4 | 3 | 3 | 5 | 1 | 4 | 2 | 3 | 3 |
| 3 | 3 | 3 | 5 | 1 | 4 | 2 | 3 | 3 |
| 3 | 5 | 1 | 4 | 2 | 4 | 2 | 4 | 2 |

|   |   |   |   |   |   |   |   |   |
|---|---|---|---|---|---|---|---|---|
| 5 | 3 | 3 | 2 | 4 | 2 | 4 | 3 | 3 |
| 4 | 2 | 4 | 4 | 2 | 4 | 2 | 1 | 5 |
| 2 | 4 | 2 | 4 | 2 | 2 | 4 | 4 | 2 |
| 4 | 3 | 3 | 3 | 3 | 4 | 2 | 4 | 2 |
| 5 | 2 | 4 | 2 | 4 | 1 | 5 | 3 | 3 |
| 4 | 2 | 4 | 3 | 3 | 2 | 4 | 2 | 4 |
| 5 | 3 | 3 | 3 | 3 | 2 | 4 | 1 | 5 |
| 5 | 1 | 5 | 3 | 3 | 3 | 3 | 3 | 3 |
| 5 | 3 | 3 | 3 | 3 | 3 | 3 | 2 | 4 |
| 2 | 3 | 3 | 4 | 2 | 4 | 2 | 3 | 3 |
| 4 | 2 | 4 | 2 | 4 | 2 | 4 | 2 | 4 |
| 4 | 3 | 3 | 1 | 5 | 1 | 5 | 1 | 5 |
| 4 | 2 | 4 | 2 | 4 | 2 | 4 | 2 | 4 |
| 5 | 4 | 2 | 2 | 4 | 3 | 3 | 4 | 2 |
| 5 | 3 | 3 | 2 | 4 | 2 | 4 | 3 | 3 |
| 3 | 4 | 2 | 4 | 2 | 4 | 2 | 2 | 4 |
| 5 | 1 | 5 | 1 | 5 | 1 | 5 | 1 | 5 |
| 5 | 2 | 4 | 3 | 3 | 2 | 4 | 2 | 4 |
| 1 | 5 | 1 | 4 | 2 | 5 | 1 | 3 | 3 |
| 3 | 2 | 4 | 3 | 3 | 4 | 2 | 2 | 4 |
| 3 | 5 | 1 | 2 | 4 | 2 | 4 | 3 | 3 |
| 3 | 4 | 2 | 4 | 2 | 4 | 2 | 3 | 3 |
| 4 | 4 | 2 | 2 | 4 | 2 | 4 | 1 | 5 |
| 5 | 2 | 4 | 2 | 4 | 3 | 3 | 2 | 4 |
| 5 | 2 | 4 | 1 | 5 | 1 | 5 | 1 | 5 |
| 2 | 4 | 2 | 2 | 4 | 2 | 4 | 3 | 3 |
| 5 | 2 | 4 | 3 | 3 | 1 | 5 | 2 | 4 |
| 4 | 3 | 3 | 3 | 3 | 3 | 3 | 2 | 4 |
| 4 | 5 | 1 | 3 | 3 | 4 | 2 | 2 | 4 |
| 4 | 2 | 4 | 2 | 4 | 2 | 4 | 1 | 5 |
| 5 | 1 | 5 | 1 | 5 | 1 | 5 | 1 | 5 |
| 3 | 5 | 1 | 5 | 1 | 2 | 4 | 5 | 1 |
| 5 | 2 | 4 | 3 | 3 | 2 | 4 | 1 | 5 |
| 4 | 2 | 4 | 2 | 4 | 2 | 4 | 1 | 5 |
| 5 | 1 | 5 | 1 | 5 | 1 | 5 | 1 | 5 |
| 4 | 4 | 2 | 5 | 1 | 4 | 2 | 4 | 2 |
| 2 | 4 | 2 | 4 | 2 | 4 | 2 | 4 | 2 |
| 5 | 1 | 5 | 1 | 5 | 2 | 4 | 2 | 4 |
| 4 | 2 | 4 | 2 | 4 | 3 | 3 | 2 | 4 |
| 3 | 5 | 1 | 4 | 2 | 3 | 3 | 2 | 4 |
| 3 | 4 | 2 | 5 | 1 | 4 | 2 | 5 | 1 |
| 4 | 4 | 2 | 5 | 1 | 5 | 1 | 2 | 4 |
| 4 | 2 | 4 | 2 | 4 | 1 | 5 | 1 | 5 |
| 3 | 5 | 1 | 5 | 1 | 5 | 1 | 4 | 2 |

| Overcome_ | Overcome_ | Conflict_fi | Conflict_fi | Job_meani | Job_meani | Work_toor | Work_toor | Physical_co |
|-----------|-----------|-------------|-------------|-----------|-----------|-----------|-----------|-------------|
| 3         | 3.00      | 4           | 4.00        | 4         | 4.00      | 3         | 3.00      | 3           |
| 1         | 1.00      | 5           | 5.00        | 5         | 5.00      | 2         | 2.00      | 2           |
| 5         | 5.00      | 5           | 5.00        | 1         | 1.00      | 1         | 1.00      | 4           |
| 3         | 3.00      | 4           | 4.00        | 5         | 5.00      | 1         | 1.00      | 3           |
| 3         | 3.00      | 1           | 1.00        | 1         | 1.00      | 2         | 2.00      | 4           |
| 4         | 4.00      | 2           | 2.00        | 5         | 5.00      | 1         | 1.00      | 2           |
| 4         | 4.00      | 4           | 4.00        | 4         | 4.00      | 4         | 4.00      | 1           |
| 4         | 4.00      | 3           | 3.00        | 4         | 4.00      | 2         | 2.00      | 4           |
| 3         | 3.00      | 4           | 4.00        | 4         | 4.00      | 2         | 2.00      | 3           |
| 4         | 4.00      | 4           | 4.00        | 5         | 5.00      | 4         | 4.00      | 4           |
| 4         | 4.00      | 5           | 5.00        | 5         | 5.00      | 4         | 4.00      | 2           |
| 4         | 4.00      | 4           | 4.00        | 4         | 4.00      | 2         | 2.00      | 2           |
| 1         | 1.00      | 2           | 2.00        | 4         | 4.00      | 2         | 2.00      | 5           |
| 2         | 2.00      | 5           | 5.00        | 5         | 5.00      | 3         | 3.00      | 5           |
| 4         | 4.00      | 2           | 2.00        | 4         | 4.00      | 2         | 2.00      | 4           |
| 2         | 2.00      | 4           | 4.00        | 4         | 4.00      | 3         | 3.00      | 4           |
| 3         | 3.00      | 2           | 2.00        | 5         | 5.00      | 1         | 1.00      | 4           |
| 3         | 3.00      | 2           | 2.00        | 2         | 2.00      | 2         | 2.00      | 2           |
| 2         | 2.00      | 3           | 3.00        | 3         | 3.00      | 1         | 1.00      | 3           |
| 1         | 1.00      | 1           | 1.00        | 2         | 2.00      | 1         | 1.00      | 4           |
| 2         | 2.00      | 2           | 2.00        | 2         | 2.00      | 2         | 2.00      | 2           |
| 2         | 2.00      | 4           | 4.00        | 4         | 4.00      | 1         | 1.00      | 4           |
| 3         | 3.00      | 4           | 4.00        | 2         | 2.00      | 2         | 2.00      | 4           |
| 3         | 3.00      | 3           | 3.00        | 2         | 2.00      | 3         | 3.00      | 3           |
| 3         | 3.00      | 4           | 4.00        | 4         | 4.00      | 2         | 2.00      | 1           |
| 3         | 3.00      | 3           | 3.00        | 3         | 3.00      | 2         | 2.00      | 4           |
| 1         | 1.00      | 3           | 3.00        | 1         | 1.00      | 1         | 1.00      | 2           |
| 5         | 5.00      | 3           | 3.00        | 5         | 5.00      | 1         | 1.00      | 5           |
| 3         | 3.00      | 4           | 4.00        | 3         | 3.00      | 1         | 1.00      | 4           |
| 3         | 3.00      | 2           | 2.00        | 4         | 4.00      | 2         | 2.00      | 4           |
| 3         | 3.00      | 3           | 3.00        | 4         | 4.00      | 3         | 3.00      | 3           |
| 2         | 2.00      | 3           | 3.00        | 4         | 4.00      | 1         | 1.00      | 4           |
| 2         | 2.00      | 3           | 3.00        | 1         | 1.00      | 1         | 1.00      | 5           |
| 4         | 4.00      | 2           | 2.00        | 4         | 4.00      | 1         | 1.00      | 5           |
| 5         | 5.00      | 4           | 4.00        | 5         | 5.00      | 1         | 1.00      | 3           |
| 3         | 3.00      | 4           | 4.00        | 3         | 3.00      | 3         | 3.00      | 2           |
| 3         | 3.00      | 3           | 3.00        | 2         | 2.00      | 2         | 2.00      | 5           |
| 1         | 1.00      | 3           | 3.00        | 1         | 1.00      | 3         | 3.00      | 5           |
| 3         | 3.00      | 5           | 5.00        | 5         | 5.00      | 2         | 2.00      | 2           |
| 2         | 2.00      | 5           | 5.00        | 5         | 5.00      | 2         | 2.00      | 4           |
| 1         | 1.00      | 1           | 1.00        | 1         | 1.00      | 1         | 1.00      | 1           |
| 5         | 5.00      | 1           | 1.00        | 5         | 5.00      | 2         | 2.00      | 4           |
| 2         | 2.00      | 4           | 4.00        | 4         | 4.00      | 2         | 2.00      | 4           |
| 5         | 5.00      | 4           | 4.00        | 5         | 5.00      | 3         | 3.00      | 3           |
| 1         | 1.00      | 3           | 3.00        | 4         | 4.00      | 2         | 2.00      | 5           |
| 3         | 3.00      | 5           | 5.00        | 5         | 5.00      | 1         | 1.00      | 5           |
| 4         | 4.00      | 2           | 2.00        | 2         | 2.00      | 2         | 2.00      | 5           |
| 3         | 3.00      | 4           | 4.00        | 4         | 4.00      | 1         | 1.00      | 5           |
| 3         | 3.00      | 3           | 3.00        | 4         | 4.00      | 1         | 1.00      | 4           |

|   |      |   |      |   |      |   |      |   |
|---|------|---|------|---|------|---|------|---|
| 2 | 2.00 | 1 | 1.00 | 1 | 1.00 | 1 | 1.00 | 5 |
| 2 | 2.00 | 5 | 5.00 | 5 | 5.00 | 1 | 1.00 | 2 |
| 3 | 3.00 | 2 | 2.00 | 3 | 3.00 | 3 | 3.00 | 4 |
| 3 | 3.00 | 4 | 4.00 | 3 | 3.00 | 2 | 2.00 | 4 |
| 3 | 3.00 | 4 | 4.00 | 5 | 5.00 | 2 | 2.00 | 2 |
| 3 | 3.00 | 2 | 2.00 | 4 | 4.00 | 2 | 2.00 | 2 |
| 3 | 3.00 | 3 | 3.00 | 3 | 3.00 | 3 | 3.00 | 2 |
| 3 | 3.00 | 4 | 4.00 | 4 | 4.00 | 2 | 2.00 | 3 |
| 1 | 1.00 | 3 | 3.00 | 4 | 4.00 | 2 | 2.00 | 2 |
| 2 | 2.00 | 5 | 5.00 | 5 | 5.00 | 1 | 1.00 | 1 |
| 2 | 2.00 | 3 | 3.00 | 4 | 4.00 | 3 | 3.00 | 3 |
| 4 | 4.00 | 3 | 3.00 | 1 | 1.00 | 3 | 3.00 | 1 |
| 3 | 3.00 | 1 | 1.00 | 1 | 1.00 | 3 | 3.00 | 1 |
| 2 | 2.00 | 1 | 1.00 | 4 | 4.00 | 3 | 3.00 | 4 |
| 3 | 3.00 | 3 | 3.00 | 4 | 4.00 | 5 | 5.00 | 3 |
| 3 | 3.00 | 2 | 2.00 | 5 | 5.00 | 4 | 4.00 | 2 |
| 3 | 3.00 | 3 | 3.00 | 3 | 3.00 | 3 | 3.00 | 3 |
| 3 | 3.00 | 3 | 3.00 | 3 | 3.00 | 1 | 1.00 | 2 |
| 2 | 2.00 | 4 | 4.00 | 4 | 4.00 | 3 | 3.00 | 3 |
| 3 | 3.00 | 4 | 4.00 | 4 | 4.00 | 2 | 2.00 | 3 |
| 3 | 3.00 | 5 | 5.00 | 4 | 4.00 | 2 | 2.00 | 3 |
| 2 | 2.00 | 1 | 1.00 | 4 | 4.00 | 2 | 2.00 | 3 |
| 3 | 3.00 | 3 | 3.00 | 3 | 3.00 | 3 | 3.00 | 3 |
| 4 | 4.00 | 5 | 5.00 | 5 | 5.00 | 3 | 3.00 | 2 |
| 4 | 4.00 | 2 | 2.00 | 5 | 5.00 | 1 | 1.00 | 4 |
| 4 | 4.00 | 1 | 1.00 | 3 | 3.00 | 3 | 3.00 | 2 |
| 1 | 1.00 | 2 | 2.00 | 2 | 2.00 | 4 | 4.00 | 5 |
| 4 | 4.00 | 4 | 4.00 | 4 | 4.00 | 3 | 3.00 | 5 |
| 1 | 1.00 | 3 | 3.00 | 2 | 2.00 | 2 | 2.00 | 3 |
| 1 | 1.00 | 2 | 2.00 | 3 | 3.00 | 1 | 1.00 | 3 |
| 2 | 2.00 | 2 | 2.00 | 2 | 2.00 | 1 | 1.00 | 4 |
| 2 | 2.00 | 1 | 1.00 | 1 | 1.00 | 2 | 2.00 | 2 |
| 3 | 3.00 | 4 | 4.00 | 5 | 5.00 | 2 | 2.00 | 1 |
| 2 | 2.00 | 2 | 2.00 | 4 | 4.00 | 2 | 2.00 | 4 |
| 2 | 2.00 | 2 | 2.00 | 5 | 5.00 | 2 | 2.00 | 2 |
| 2 | 2.00 | 4 | 4.00 | 5 | 5.00 | 3 | 3.00 | 2 |
| 3 | 3.00 | 2 | 2.00 | 3 | 3.00 | 1 | 1.00 | 5 |
| 3 | 3.00 | 4 | 4.00 | 3 | 3.00 | 3 | 3.00 | 3 |
| 3 | 3.00 | 3 | 3.00 | 3 | 3.00 | 1 | 1.00 | 3 |
| 1 | 1.00 | 1 | 1.00 | 4 | 4.00 | 1 | 1.00 | 4 |
| 2 | 2.00 | 2 | 2.00 | 4 | 4.00 | 1 | 1.00 | 5 |
| 3 | 3.00 | 3 | 3.00 | 5 | 5.00 | 1 | 1.00 | 3 |
| 4 | 4.00 | 2 | 2.00 | 4 | 4.00 | 2 | 2.00 | 2 |
| 2 | 2.00 | 2 | 2.00 | 2 | 2.00 | 2 | 2.00 | 3 |
| 4 | 4.00 | 4 | 4.00 | 5 | 5.00 | 2 | 2.00 | 2 |
| 3 | 3.00 | 4 | 4.00 | 4 | 4.00 | 4 | 4.00 | 5 |
| 3 | 3.00 | 3 | 3.00 | 3 | 3.00 | 3 | 3.00 | 1 |
| 1 | 1.00 | 2 | 2.00 | 2 | 2.00 | 1 | 1.00 | 5 |
| 1 | 1.00 | 1 | 1.00 | 4 | 4.00 | 1 | 1.00 | 4 |
| 3 | 3.00 | 2 | 2.00 | 4 | 4.00 | 3 | 3.00 | 5 |

|   |      |   |      |   |      |   |      |   |
|---|------|---|------|---|------|---|------|---|
| 2 | 2.00 | 3 | 3.00 | 4 | 4.00 | 3 | 3.00 | 3 |
| 2 | 2.00 | 3 | 3.00 | 4 | 4.00 | 2 | 2.00 | 5 |
| 1 | 1.00 | 1 | 1.00 | 4 | 4.00 | 2 | 2.00 | 4 |
| 3 | 3.00 | 4 | 4.00 | 2 | 2.00 | 3 | 3.00 | 3 |
| 1 | 1.00 | 2 | 2.00 | 5 | 5.00 | 2 | 2.00 | 2 |
| 2 | 2.00 | 4 | 4.00 | 4 | 4.00 | 2 | 2.00 | 4 |
| 4 | 4.00 | 2 | 2.00 | 3 | 3.00 | 2 | 2.00 | 2 |
| 3 | 3.00 | 1 | 1.00 | 3 | 3.00 | 3 | 3.00 | 3 |
| 3 | 3.00 | 3 | 3.00 | 4 | 4.00 | 3 | 3.00 | 3 |
| 3 | 3.00 | 2 | 2.00 | 5 | 5.00 | 2 | 2.00 | 4 |
| 2 | 2.00 | 4 | 4.00 | 4 | 4.00 | 4 | 4.00 | 2 |
| 1 | 1.00 | 5 | 5.00 | 5 | 5.00 | 2 | 2.00 | 2 |
| 3 | 3.00 | 4 | 4.00 | 4 | 4.00 | 2 | 2.00 | 4 |
| 4 | 4.00 | 4 | 4.00 | 5 | 5.00 | 2 | 2.00 | 2 |
| 2 | 2.00 | 4 | 4.00 | 5 | 5.00 | 2 | 2.00 | 3 |
| 2 | 2.00 | 3 | 3.00 | 4 | 4.00 | 2 | 2.00 | 3 |
| 1 | 1.00 | 1 | 1.00 | 4 | 4.00 | 2 | 2.00 | 1 |
| 2 | 2.00 | 4 | 4.00 | 4 | 4.00 | 2 | 2.00 | 4 |
| 2 | 2.00 | 2 | 2.00 | 2 | 2.00 | 1 | 1.00 | 4 |
| 3 | 3.00 | 4 | 4.00 | 4 | 4.00 | 3 | 3.00 | 3 |
| 2 | 2.00 | 2 | 2.00 | 2 | 2.00 | 2 | 2.00 | 5 |
| 3 | 3.00 | 4 | 4.00 | 3 | 3.00 | 2 | 2.00 | 2 |
| 3 | 3.00 | 5 | 5.00 | 3 | 3.00 | 1 | 1.00 | 2 |
| 4 | 4.00 | 4 | 4.00 | 4 | 4.00 | 3 | 3.00 | 2 |
| 1 | 1.00 | 4 | 4.00 | 4 | 4.00 | 3 | 3.00 | 1 |
| 3 | 3.00 | 2 | 2.00 | 2 | 2.00 | 2 | 2.00 | 2 |
| 3 | 3.00 | 3 | 3.00 | 3 | 3.00 | 2 | 2.00 | 3 |
| 2 | 2.00 | 5 | 5.00 | 3 | 3.00 | 3 | 3.00 | 2 |
| 3 | 3.00 | 2 | 2.00 | 2 | 2.00 | 3 | 3.00 | 5 |
| 1 | 1.00 | 4 | 4.00 | 4 | 4.00 | 3 | 3.00 | 2 |
| 2 | 2.00 | 4 | 4.00 | 4 | 4.00 | 1 | 1.00 | 2 |
| 1 | 1.00 | 5 | 5.00 | 1 | 1.00 | 3 | 3.00 | 5 |
| 4 | 4.00 | 4 | 4.00 | 4 | 4.00 | 2 | 2.00 | 5 |
| 4 | 4.00 | 4 | 4.00 | 5 | 5.00 | 3 | 3.00 | 2 |
| 1 | 1.00 | 1 | 1.00 | 4 | 4.00 | 1 | 1.00 | 5 |
| 2 | 2.00 | 2 | 2.00 | 2 | 2.00 | 3 | 3.00 | 4 |
| 3 | 3.00 | 3 | 3.00 | 3 | 3.00 | 3 | 3.00 | 4 |
| 2 | 2.00 | 3 | 3.00 | 4 | 4.00 | 3 | 3.00 | 2 |
| 3 | 3.00 | 4 | 4.00 | 5 | 5.00 | 2 | 2.00 | 3 |
| 4 | 4.00 | 2 | 2.00 | 1 | 1.00 | 3 | 3.00 | 5 |
| 3 | 3.00 | 3 | 3.00 | 2 | 2.00 | 3 | 3.00 | 5 |
| 1 | 1.00 | 1 | 1.00 | 1 | 1.00 | 1 | 1.00 | 5 |
| 3 | 3.00 | 3 | 3.00 | 5 | 5.00 | 4 | 4.00 | 3 |
| 2 | 2.00 | 2 | 2.00 | 4 | 4.00 | 2 | 2.00 | 5 |

| Physical_cr | Like_work | Like_work | Job_descri | Job_descri | Responsibl | Responsibl | Public_he | Public_he |
|-------------|-----------|-----------|------------|------------|------------|------------|-----------|-----------|
| 3.00        | 2         | 4.00      | 3          | 3.00       | 2          | 4.00       | 4         | 2.00      |
| 4.00        | 2         | 4.00      | 1          | 5.00       | 1          | 5.00       | 1         | 5.00      |
| 2.00        | 5         | 1.00      | 2          | 4.00       | 1          | 5.00       | 1         | 5.00      |
| 3.00        | 1         | 5.00      | 1          | 5.00       | 1          | 5.00       | 1         | 5.00      |
| 2.00        | 1         | 5.00      | 2          | 4.00       | 2          | 4.00       | 2         | 4.00      |
| 4.00        | 1         | 5.00      | 2          | 4.00       | 1          | 5.00       | 1         | 5.00      |
| 5.00        | 2         | 4.00      | 2          | 4.00       | 2          | 4.00       | 2         | 4.00      |
| 2.00        | 2         | 4.00      | 2          | 4.00       | 1          | 5.00       | 3         | 3.00      |
| 3.00        | 2         | 4.00      | 2          | 4.00       | 2          | 4.00       | 2         | 4.00      |
| 2.00        | 2         | 4.00      | 2          | 4.00       | 2          | 4.00       | 2         | 4.00      |
| 4.00        | 2         | 4.00      | 2          | 4.00       | 1          | 5.00       | 1         | 5.00      |
| 4.00        | 2         | 4.00      | 2          | 4.00       | 2          | 4.00       | 2         | 4.00      |
| 1.00        | 2         | 4.00      | 4          | 2.00       | 2          | 4.00       | 2         | 4.00      |
| 1.00        | 3         | 3.00      | 3          | 3.00       | 2          | 4.00       | 4         | 2.00      |
| 2.00        | 2         | 4.00      | 4          | 2.00       | 2          | 4.00       | 2         | 4.00      |
| 2.00        | 2         | 4.00      | 2          | 4.00       | 2          | 4.00       | 2         | 4.00      |
| 2.00        | 4         | 2.00      | 1          | 5.00       | 1          | 5.00       | 1         | 5.00      |
| 4.00        | 1         | 5.00      | 3          | 3.00       | 3          | 3.00       | 2         | 4.00      |
| 3.00        | 3         | 3.00      | 2          | 4.00       | 2          | 4.00       | 1         | 5.00      |
| 2.00        | 5         | 1.00      | 3          | 3.00       | 2          | 4.00       | 2         | 4.00      |
| 4.00        | 2         | 4.00      | 3          | 3.00       | 2          | 4.00       | 2         | 4.00      |
| 2.00        | 2         | 4.00      | 2          | 4.00       | 2          | 4.00       | 2         | 4.00      |
| 2.00        | 1         | 5.00      | 1          | 5.00       | 1          | 5.00       | 2         | 4.00      |
| 3.00        | 2         | 4.00      | 3          | 3.00       | 3          | 3.00       | 3         | 3.00      |
| 5.00        | 3         | 3.00      | 4          | 2.00       | 5          | 1.00       | 2         | 4.00      |
| 2.00        | 3         | 3.00      | 3          | 3.00       | 3          | 3.00       | 2         | 4.00      |
| 4.00        | 3         | 3.00      | 5          | 1.00       | 2          | 4.00       | 3         | 3.00      |
| 1.00        | 2         | 4.00      | 5          | 1.00       | 5          | 1.00       | 1         | 5.00      |
| 2.00        | 1         | 5.00      | 4          | 2.00       | 2          | 4.00       | 1         | 5.00      |
| 2.00        | 3         | 3.00      | 5          | 1.00       | 2          | 4.00       | 2         | 4.00      |
| 3.00        | 2         | 4.00      | 2          | 4.00       | 3          | 3.00       | 2         | 4.00      |
| 2.00        | 2         | 4.00      | 4          | 2.00       | 2          | 4.00       | 2         | 4.00      |
| 1.00        | 5         | 1.00      | 4          | 2.00       | 3          | 3.00       | 3         | 3.00      |
| 1.00        | 4         | 2.00      | 4          | 2.00       | 2          | 4.00       | 3         | 3.00      |
| 3.00        | 2         | 4.00      | 5          | 1.00       | 1          | 5.00       | 2         | 4.00      |
| 4.00        | 4         | 2.00      | 2          | 4.00       | 2          | 4.00       | 2         | 4.00      |
| 1.00        | 3         | 3.00      | 3          | 3.00       | 3          | 3.00       | 2         | 4.00      |
| 1.00        | 2         | 4.00      | 1          | 5.00       | 2          | 4.00       | 3         | 3.00      |
| 4.00        | 1         | 5.00      | 1          | 5.00       | 1          | 5.00       | 1         | 5.00      |
| 2.00        | 1         | 5.00      | 2          | 4.00       | 3          | 3.00       | 1         | 5.00      |
| 5.00        | 1         | 5.00      | 1          | 5.00       | 1          | 5.00       | 1         | 5.00      |
| 2.00        | 2         | 4.00      | 3          | 3.00       | 1          | 5.00       | 2         | 4.00      |
| 2.00        | 1         | 5.00      | 3          | 3.00       | 2          | 4.00       | 1         | 5.00      |
| 3.00        | 2         | 4.00      | 2          | 4.00       | 1          | 5.00       | 1         | 5.00      |
| 1.00        | 3         | 3.00      | 4          | 2.00       | 2          | 4.00       | 2         | 4.00      |
| 1.00        | 3         | 3.00      | 2          | 4.00       | 1          | 5.00       | 1         | 5.00      |
| 1.00        | 4         | 2.00      | 2          | 4.00       | 2          | 4.00       | 1         | 5.00      |
| 1.00        | 1         | 5.00      | 5          | 1.00       | 1          | 5.00       | 1         | 5.00      |
| 2.00        | 3         | 3.00      | 4          | 2.00       | 3          | 3.00       | 2         | 4.00      |

|      |   |      |   |      |   |      |   |      |
|------|---|------|---|------|---|------|---|------|
| 1.00 | 4 | 2.00 | 5 | 1.00 | 2 | 4.00 | 1 | 5.00 |
| 4.00 | 1 | 5.00 | 2 | 4.00 | 1 | 5.00 | 1 | 5.00 |
| 2.00 | 2 | 4.00 | 3 | 3.00 | 3 | 3.00 | 2 | 4.00 |
| 2.00 | 3 | 3.00 | 3 | 3.00 | 3 | 3.00 | 2 | 4.00 |
| 4.00 | 1 | 5.00 | 1 | 5.00 | 1 | 5.00 | 1 | 5.00 |
| 4.00 | 2 | 4.00 | 3 | 3.00 | 2 | 4.00 | 2 | 4.00 |
| 4.00 | 1 | 5.00 | 3 | 3.00 | 3 | 3.00 | 1 | 5.00 |
| 3.00 | 2 | 4.00 | 2 | 4.00 | 3 | 3.00 | 2 | 4.00 |
| 4.00 | 1 | 5.00 | 1 | 5.00 | 1 | 5.00 | 1 | 5.00 |
| 5.00 | 1 | 5.00 | 1 | 5.00 | 1 | 5.00 | 1 | 5.00 |
| 3.00 | 3 | 3.00 | 4 | 2.00 | 2 | 4.00 | 2 | 4.00 |
| 5.00 | 5 | 1.00 | 2 | 4.00 | 2 | 4.00 | 5 | 1.00 |
| 5.00 | 1 | 5.00 | 1 | 5.00 | 1 | 5.00 | 3 | 3.00 |
| 2.00 | 3 | 3.00 | 4 | 2.00 | 2 | 4.00 | 2 | 4.00 |
| 3.00 | 1 | 5.00 | 3 | 3.00 | 1 | 5.00 | 2 | 4.00 |
| 4.00 | 2 | 4.00 | 2 | 4.00 | 2 | 4.00 | 1 | 5.00 |
| 3.00 | 3 | 3.00 | 3 | 3.00 | 3 | 3.00 | 3 | 3.00 |
| 4.00 | 2 | 4.00 | 2 | 4.00 | 1 | 5.00 | 2 | 4.00 |
| 3.00 | 2 | 4.00 | 2 | 4.00 | 2 | 4.00 | 2 | 4.00 |
| 3.00 | 2 | 4.00 | 2 | 4.00 | 2 | 4.00 | 3 | 3.00 |
| 3.00 | 2 | 4.00 | 2 | 4.00 | 2 | 4.00 | 2 | 4.00 |
| 3.00 | 1 | 5.00 | 2 | 4.00 | 2 | 4.00 | 3 | 3.00 |
| 3.00 | 1 | 5.00 | 3 | 3.00 | 3 | 3.00 | 3 | 3.00 |
| 4.00 | 2 | 4.00 | 2 | 4.00 | 1 | 5.00 | 2 | 4.00 |
| 2.00 | 3 | 3.00 | 3 | 3.00 | 1 | 5.00 | 1 | 5.00 |
| 4.00 | 2 | 4.00 | 2 | 4.00 | 1 | 5.00 | 3 | 3.00 |
| 1.00 | 3 | 3.00 | 2 | 4.00 | 2 | 4.00 | 2 | 4.00 |
| 1.00 | 2 | 4.00 | 2 | 4.00 | 2 | 4.00 | 2 | 4.00 |
| 3.00 | 2 | 4.00 | 2 | 4.00 | 2 | 4.00 | 2 | 4.00 |
| 3.00 | 2 | 4.00 | 3 | 3.00 | 2 | 4.00 | 3 | 3.00 |
| 2.00 | 4 | 2.00 | 2 | 4.00 | 2 | 4.00 | 2 | 4.00 |
| 4.00 | 1 | 5.00 | 1 | 5.00 | 1 | 5.00 | 2 | 4.00 |
| 5.00 | 1 | 5.00 | 1 | 5.00 | 1 | 5.00 | 1 | 5.00 |
| 2.00 | 1 | 5.00 | 3 | 3.00 | 1 | 5.00 | 2 | 4.00 |
| 4.00 | 2 | 4.00 | 2 | 4.00 | 2 | 4.00 | 2 | 4.00 |
| 4.00 | 1 | 5.00 | 2 | 4.00 | 2 | 4.00 | 2 | 4.00 |
| 1.00 | 2 | 4.00 | 2 | 4.00 | 2 | 4.00 | 2 | 4.00 |
| 3.00 | 3 | 3.00 | 2 | 4.00 | 2 | 4.00 | 3 | 3.00 |
| 3.00 | 3 | 3.00 | 3 | 3.00 | 3 | 3.00 | 3 | 3.00 |
| 2.00 | 3 | 3.00 | 5 | 1.00 | 1 | 5.00 | 1 | 5.00 |
| 1.00 | 2 | 4.00 | 3 | 3.00 | 2 | 4.00 | 1 | 5.00 |
| 3.00 | 1 | 5.00 | 2 | 4.00 | 2 | 4.00 | 2 | 4.00 |
| 4.00 | 2 | 4.00 | 2 | 4.00 | 2 | 4.00 | 2 | 4.00 |
| 3.00 | 4 | 2.00 | 2 | 4.00 | 2 | 4.00 | 4 | 2.00 |
| 4.00 | 1 | 5.00 | 2 | 4.00 | 2 | 4.00 | 2 | 4.00 |
| 1.00 | 5 | 1.00 | 5 | 1.00 | 1 | 5.00 | 4 | 2.00 |
| 5.00 | 2 | 4.00 | 4 | 2.00 | 1 | 5.00 | 3 | 3.00 |
| 1.00 | 2 | 4.00 | 4 | 2.00 | 2 | 4.00 | 2 | 4.00 |
| 2.00 | 1 | 5.00 | 4 | 2.00 | 1 | 5.00 | 2 | 4.00 |
| 1.00 | 4 | 2.00 | 4 | 2.00 | 3 | 3.00 | 3 | 3.00 |

|      |   |      |   |      |   |      |   |      |
|------|---|------|---|------|---|------|---|------|
| 3.00 | 2 | 4.00 | 2 | 4.00 | 2 | 4.00 | 2 | 4.00 |
| 1.00 | 3 | 3.00 | 2 | 4.00 | 2 | 4.00 | 2 | 4.00 |
| 2.00 | 2 | 4.00 | 1 | 5.00 | 1 | 5.00 | 1 | 5.00 |
| 3.00 | 2 | 4.00 | 5 | 1.00 | 5 | 1.00 | 2 | 4.00 |
| 4.00 | 1 | 5.00 | 1 | 5.00 | 1 | 5.00 | 1 | 5.00 |
| 2.00 | 2 | 4.00 | 2 | 4.00 | 2 | 4.00 | 2 | 4.00 |
| 4.00 | 2 | 4.00 | 3 | 3.00 | 2 | 4.00 | 3 | 3.00 |
| 3.00 | 3 | 3.00 | 3 | 3.00 | 3 | 3.00 | 2 | 4.00 |
| 3.00 | 2 | 4.00 | 2 | 4.00 | 2 | 4.00 | 3 | 3.00 |
| 2.00 | 2 | 4.00 | 2 | 4.00 | 2 | 4.00 | 2 | 4.00 |
| 4.00 | 2 | 4.00 | 2 | 4.00 | 2 | 4.00 | 2 | 4.00 |
| 4.00 | 1 | 5.00 | 1 | 5.00 | 1 | 5.00 | 1 | 5.00 |
| 2.00 | 1 | 5.00 | 2 | 4.00 | 2 | 4.00 | 2 | 4.00 |
| 4.00 | 1 | 5.00 | 2 | 4.00 | 2 | 4.00 | 3 | 3.00 |
| 3.00 | 2 | 4.00 | 3 | 3.00 | 2 | 4.00 | 1 | 5.00 |
| 3.00 | 1 | 5.00 | 4 | 2.00 | 2 | 4.00 | 2 | 4.00 |
| 5.00 | 1 | 5.00 | 1 | 5.00 | 1 | 5.00 | 1 | 5.00 |
| 2.00 | 2 | 4.00 | 2 | 4.00 | 2 | 4.00 | 2 | 4.00 |
| 2.00 | 4 | 2.00 | 4 | 2.00 | 2 | 4.00 | 3 | 3.00 |
| 3.00 | 4 | 2.00 | 3 | 3.00 | 2 | 4.00 | 2 | 4.00 |
| 1.00 | 1 | 5.00 | 2 | 4.00 | 2 | 4.00 | 3 | 3.00 |
| 4.00 | 2 | 4.00 | 2 | 4.00 | 2 | 4.00 | 2 | 4.00 |
| 4.00 | 3 | 3.00 | 1 | 5.00 | 1 | 5.00 | 1 | 5.00 |
| 4.00 | 2 | 4.00 | 2 | 4.00 | 2 | 4.00 | 3 | 3.00 |
| 5.00 | 2 | 4.00 | 1 | 5.00 | 1 | 5.00 | 1 | 5.00 |
| 4.00 | 2 | 4.00 | 2 | 4.00 | 2 | 4.00 | 2 | 4.00 |
| 3.00 | 3 | 3.00 | 2 | 4.00 | 2 | 4.00 | 3 | 3.00 |
| 4.00 | 3 | 3.00 | 3 | 3.00 | 3 | 3.00 | 3 | 3.00 |
| 1.00 | 2 | 4.00 | 4 | 2.00 | 1 | 5.00 | 2 | 4.00 |
| 4.00 | 3 | 3.00 | 2 | 4.00 | 2 | 4.00 | 2 | 4.00 |
| 4.00 | 1 | 5.00 | 2 | 4.00 | 2 | 4.00 | 3 | 3.00 |
| 1.00 | 3 | 3.00 | 5 | 1.00 | 4 | 2.00 | 3 | 3.00 |
| 1.00 | 2 | 4.00 | 2 | 4.00 | 2 | 4.00 | 2 | 4.00 |
| 4.00 | 2 | 4.00 | 2 | 4.00 | 2 | 4.00 | 1 | 5.00 |
| 1.00 | 1 | 5.00 | 1 | 5.00 | 1 | 5.00 | 1 | 5.00 |
| 2.00 | 2 | 4.00 | 2 | 4.00 | 3 | 3.00 | 3 | 3.00 |
| 2.00 | 3 | 3.00 | 3 | 3.00 | 3 | 3.00 | 3 | 3.00 |
| 4.00 | 2 | 4.00 | 2 | 4.00 | 2 | 4.00 | 3 | 3.00 |
| 3.00 | 2 | 4.00 | 2 | 4.00 | 2 | 4.00 | 2 | 4.00 |
| 1.00 | 4 | 2.00 | 4 | 2.00 | 4 | 2.00 | 3 | 3.00 |
| 1.00 | 3 | 3.00 | 4 | 2.00 | 3 | 3.00 | 3 | 3.00 |
| 1.00 | 5 | 1.00 | 5 | 1.00 | 2 | 4.00 | 2 | 4.00 |
| 3.00 | 1 | 5.00 | 1 | 5.00 | 1 | 5.00 | 4 | 2.00 |
| 1.00 | 3 | 3.00 | 3 | 3.00 | 2 | 4.00 | 1 | 5.00 |



| Medical_e | Medicl_eq | Patient_tin | Patient_tin | Freedom_c | Freedom_c | Shared_de | Shared_de | Social_corr |
|-----------|-----------|-------------|-------------|-----------|-----------|-----------|-----------|-------------|
| 2         | 4.00      | 2           | 4.00        | 2         | 4.00      | 2         | 4.00      | 1           |
| 3         | 3.00      | 2           | 4.00        | 2         | 4.00      | 2         | 4.00      | 3           |
| 4         | 2.00      | 5           | 1.00        | 1         | 5.00      | 1         | 5.00      | 5           |
| 2         | 4.00      | 1           | 5.00        | 1         | 5.00      | 1         | 5.00      | 1           |
| 3         | 3.00      | 3           | 3.00        | 2         | 4.00      | 2         | 4.00      | 4           |
| 3         | 3.00      | 3           | 3.00        | 4         | 2.00      | 2         | 4.00      | 1           |
| 2         | 4.00      | 2           | 4.00        | 2         | 4.00      | 2         | 4.00      | 2           |
| 1         | 5.00      | 2           | 4.00        | 4         | 2.00      | 1         | 5.00      | 2           |
| 2         | 4.00      | 2           | 4.00        | 3         | 3.00      | 2         | 4.00      | 2           |
| 3         | 3.00      | 6           | #NULL!      | 4         | 2.00      | 2         | 4.00      | 4           |
| 4         | 2.00      | 4           | 2.00        | 3         | 3.00      | 2         | 4.00      | 3           |
| 1         | 5.00      | 1           | 5.00        | 1         | 5.00      | 1         | 5.00      | 3           |
| 4         | 2.00      | 2           | 4.00        | 2         | 4.00      | 2         | 4.00      | 5           |
| 4         | 2.00      | 4           | 2.00        | 3         | 3.00      | 3         | 3.00      | 2           |
| 4         | 2.00      | 3           | 3.00        | 2         | 4.00      | 2         | 4.00      | 4           |
| 4         | 2.00      | 2           | 4.00        | 2         | 4.00      | 2         | 4.00      | 4           |
| 3         | 3.00      | 3           | 3.00        | 2         | 4.00      | 2         | 4.00      | 4           |
| 2         | 4.00      | 2           | 4.00        | 2         | 4.00      | 3         | 3.00      | 2           |
| 2         | 4.00      | 3           | 3.00        | 2         | 4.00      | 2         | 4.00      | 4           |
| 4         | 2.00      | 4           | 2.00        | 4         | 2.00      | 2         | 4.00      | 5           |
| 2         | 4.00      | 2           | 4.00        | 2         | 4.00      | 2         | 4.00      | 3           |
| 4         | 2.00      | 2           | 4.00        | 4         | 2.00      | 2         | 4.00      | 1           |
| 4         | 2.00      | 4           | 2.00        | 2         | 4.00      | 1         | 5.00      | 2           |
| 3         | 3.00      | 3           | 3.00        | 3         | 3.00      | 3         | 3.00      | 3           |
| 3         | 3.00      | 5           | 1.00        | 5         | 1.00      | 2         | 4.00      | 2           |
| 4         | 2.00      | 3           | 3.00        | 2         | 4.00      | 2         | 4.00      | 4           |
| 4         | 2.00      | 4           | 2.00        | 4         | 2.00      | 2         | 4.00      | 5           |
| 5         | 1.00      | 5           | 1.00        | 5         | 1.00      | 1         | 5.00      | 5           |
| 4         | 2.00      | 5           | 1.00        | 2         | 4.00      | 1         | 5.00      | 4           |
| 5         | 1.00      | 5           | 1.00        | 2         | 4.00      | 1         | 5.00      | 4           |
| 3         | 3.00      | 2           | 4.00        | 2         | 4.00      | 2         | 4.00      | 3           |
| 2         | 4.00      | 4           | 2.00        | 2         | 4.00      | 2         | 4.00      | 3           |
| 4         | 2.00      | 5           | 1.00        | 2         | 4.00      | 1         | 5.00      | 3           |
| 4         | 2.00      | 4           | 2.00        | 2         | 4.00      | 2         | 4.00      | 5           |
| 2         | 4.00      | 3           | 3.00        | 2         | 4.00      | 1         | 5.00      | 2           |
| 4         | 2.00      | 4           | 2.00        | 3         | 3.00      | 3         | 3.00      | 2           |
| 5         | 1.00      | 3           | 3.00        | 3         | 3.00      | 2         | 4.00      | 5           |
| 4         | 2.00      | 5           | 1.00        | 2         | 4.00      | 1         | 5.00      | 3           |
| 1         | 5.00      | 2           | 4.00        | 1         | 5.00      | 1         | 5.00      | 1           |
| 4         | 2.00      | 1           | 5.00        | 1         | 5.00      | 2         | 4.00      | 4           |
| 1         | 5.00      | 3           | 3.00        | 1         | 5.00      | 1         | 5.00      | 1           |
| 2         | 4.00      | 3           | 3.00        | 1         | 5.00      | 1         | 5.00      | 4           |
| 3         | 3.00      | 3           | 3.00        | 2         | 4.00      | 2         | 4.00      | 2           |
| 3         | 3.00      | 3           | 3.00        | 2         | 4.00      | 1         | 5.00      | 3           |
| 4         | 2.00      | 5           | 1.00        | 3         | 3.00      | 1         | 5.00      | 5           |
| 5         | 1.00      | 4           | 2.00        | 3         | 3.00      | 1         | 5.00      | 1           |
| 4         | 2.00      | 5           | 1.00        | 3         | 3.00      | 2         | 4.00      | 4           |
| 4         | 2.00      | 5           | 1.00        | 3         | 3.00      | 3         | 3.00      | 4           |
| 4         | 2.00      | 2           | 4.00        | 2         | 4.00      | 2         | 4.00      | 5           |

|   |      |   |        |   |        |   |        |   |
|---|------|---|--------|---|--------|---|--------|---|
| 5 | 1.00 | 5 | 1.00   | 5 | 1.00   | 3 | 3.00   | 5 |
| 2 | 4.00 | 2 | 4.00   | 2 | 4.00   | 2 | 4.00   | 2 |
| 3 | 3.00 | 3 | 3.00   | 2 | 4.00   | 2 | 4.00   | 3 |
| 3 | 3.00 | 4 | 2.00   | 3 | 3.00   | 2 | 4.00   | 5 |
| 2 | 4.00 | 2 | 4.00   | 3 | 3.00   | 2 | 4.00   | 2 |
| 2 | 4.00 | 2 | 4.00   | 2 | 4.00   | 2 | 4.00   | 3 |
| 3 | 3.00 | 2 | 4.00   | 2 | 4.00   | 2 | 4.00   | 4 |
| 3 | 3.00 | 4 | 2.00   | 2 | 4.00   | 2 | 4.00   | 5 |
| 2 | 4.00 | 1 | 5.00   | 1 | 5.00   | 1 | 5.00   | 1 |
| 1 | 5.00 | 1 | 5.00   | 2 | 4.00   | 1 | 5.00   | 1 |
| 4 | 2.00 | 3 | 3.00   | 2 | 4.00   | 2 | 4.00   | 2 |
| 2 | 4.00 | 5 | 1.00   | 6 | #NULL! | 6 | #NULL! | 5 |
| 1 | 5.00 | 3 | 3.00   | 1 | 5.00   | 1 | 5.00   | 3 |
| 2 | 4.00 | 3 | 3.00   | 2 | 4.00   | 2 | 4.00   | 5 |
| 3 | 3.00 | 3 | 3.00   | 6 | #NULL! | 6 | #NULL! | 2 |
| 2 | 4.00 | 2 | 4.00   | 3 | 3.00   | 2 | 4.00   | 2 |
| 3 | 3.00 | 3 | 3.00   | 3 | 3.00   | 3 | 3.00   | 3 |
| 3 | 3.00 | 3 | 3.00   | 2 | 4.00   | 3 | 3.00   | 2 |
| 2 | 4.00 | 2 | 4.00   | 3 | 3.00   | 2 | 4.00   | 2 |
| 3 | 3.00 | 3 | 3.00   | 3 | 3.00   | 3 | 3.00   | 3 |
| 2 | 4.00 | 3 | 3.00   | 3 | 3.00   | 2 | 4.00   | 2 |
| 2 | 4.00 | 3 | 3.00   | 3 | 3.00   | 3 | 3.00   | 3 |
| 3 | 3.00 | 3 | 3.00   | 4 | 2.00   | 3 | 3.00   | 3 |
| 2 | 4.00 | 2 | 4.00   | 2 | 4.00   | 2 | 4.00   | 2 |
| 5 | 1.00 | 4 | 2.00   | 6 | #NULL! | 3 | 3.00   | 5 |
| 3 | 3.00 | 4 | 2.00   | 2 | 4.00   | 2 | 4.00   | 3 |
| 4 | 2.00 | 2 | 4.00   | 3 | 3.00   | 2 | 4.00   | 4 |
| 4 | 2.00 | 2 | 4.00   | 2 | 4.00   | 2 | 4.00   | 4 |
| 2 | 4.00 | 5 | 1.00   | 2 | 4.00   | 2 | 4.00   | 4 |
| 3 | 3.00 | 3 | 3.00   | 3 | 3.00   | 2 | 4.00   | 4 |
| 2 | 4.00 | 2 | 4.00   | 2 | 4.00   | 2 | 4.00   | 5 |
| 4 | 2.00 | 1 | 5.00   | 2 | 4.00   | 1 | 5.00   | 4 |
| 2 | 4.00 | 2 | 4.00   | 2 | 4.00   | 2 | 4.00   | 2 |
| 4 | 2.00 | 2 | 4.00   | 4 | 2.00   | 1 | 5.00   | 4 |
| 2 | 4.00 | 2 | 4.00   | 2 | 4.00   | 2 | 4.00   | 3 |
| 2 | 4.00 | 2 | 4.00   | 2 | 4.00   | 2 | 4.00   | 3 |
| 5 | 1.00 | 2 | 4.00   | 6 | #NULL! | 1 | 5.00   | 4 |
| 3 | 3.00 | 3 | 3.00   | 3 | 3.00   | 3 | 3.00   | 3 |
| 3 | 3.00 | 3 | 3.00   | 3 | 3.00   | 3 | 3.00   | 3 |
| 4 | 2.00 | 5 | 1.00   | 4 | 2.00   | 2 | 4.00   | 5 |
| 4 | 2.00 | 2 | 4.00   | 4 | 2.00   | 2 | 4.00   | 4 |
| 3 | 3.00 | 2 | 4.00   | 2 | 4.00   | 2 | 4.00   | 2 |
| 2 | 4.00 | 2 | 4.00   | 2 | 4.00   | 2 | 4.00   | 4 |
| 3 | 3.00 | 2 | 4.00   | 2 | 4.00   | 2 | 4.00   | 2 |
| 2 | 4.00 | 2 | 4.00   | 2 | 4.00   | 2 | 4.00   | 2 |
| 4 | 2.00 | 6 | #NULL! | 6 | #NULL! | 6 | #NULL! | 5 |
| 1 | 5.00 | 3 | 3.00   | 2 | 4.00   | 2 | 4.00   | 2 |
| 3 | 3.00 | 2 | 4.00   | 4 | 2.00   | 3 | 3.00   | 5 |
| 4 | 2.00 | 1 | 5.00   | 3 | 3.00   | 3 | 3.00   | 4 |
| 5 | 1.00 | 3 | 3.00   | 3 | 3.00   | 3 | 3.00   | 3 |

|   |      |   |        |   |        |   |        |   |
|---|------|---|--------|---|--------|---|--------|---|
| 4 | 2.00 | 2 | 4.00   | 3 | 3.00   | 3 | 3.00   | 3 |
| 5 | 1.00 | 2 | 4.00   | 4 | 2.00   | 3 | 3.00   | 4 |
| 4 | 2.00 | 5 | 1.00   | 3 | 3.00   | 2 | 4.00   | 2 |
| 4 | 2.00 | 4 | 2.00   | 2 | 4.00   | 2 | 4.00   | 4 |
| 1 | 5.00 | 2 | 4.00   | 2 | 4.00   | 2 | 4.00   | 5 |
| 4 | 2.00 | 2 | 4.00   | 2 | 4.00   | 2 | 4.00   | 2 |
| 2 | 4.00 | 1 | 5.00   | 3 | 3.00   | 2 | 4.00   | 4 |
| 3 | 3.00 | 3 | 3.00   | 3 | 3.00   | 3 | 3.00   | 2 |
| 5 | 1.00 | 3 | 3.00   | 3 | 3.00   | 2 | 4.00   | 5 |
| 4 | 2.00 | 1 | 5.00   | 2 | 4.00   | 1 | 5.00   | 3 |
| 2 | 4.00 | 2 | 4.00   | 2 | 4.00   | 2 | 4.00   | 2 |
| 2 | 4.00 | 1 | 5.00   | 3 | 3.00   | 1 | 5.00   | 2 |
| 4 | 2.00 | 2 | 4.00   | 3 | 3.00   | 3 | 3.00   | 2 |
| 4 | 2.00 | 2 | 4.00   | 3 | 3.00   | 2 | 4.00   | 2 |
| 3 | 3.00 | 3 | 3.00   | 2 | 4.00   | 2 | 4.00   | 4 |
| 2 | 4.00 | 2 | 4.00   | 4 | 2.00   | 2 | 4.00   | 3 |
| 1 | 5.00 | 1 | 5.00   | 1 | 5.00   | 1 | 5.00   | 1 |
| 3 | 3.00 | 2 | 4.00   | 2 | 4.00   | 2 | 4.00   | 3 |
| 2 | 4.00 | 4 | 2.00   | 4 | 2.00   | 2 | 4.00   | 4 |
| 4 | 2.00 | 3 | 3.00   | 2 | 4.00   | 2 | 4.00   | 2 |
| 5 | 1.00 | 3 | 3.00   | 2 | 4.00   | 2 | 4.00   | 2 |
| 3 | 3.00 | 2 | 4.00   | 2 | 4.00   | 2 | 4.00   | 3 |
| 2 | 4.00 | 3 | 3.00   | 2 | 4.00   | 3 | 3.00   | 2 |
| 3 | 3.00 | 2 | 4.00   | 2 | 4.00   | 2 | 4.00   | 3 |
| 1 | 5.00 | 1 | 5.00   | 3 | 3.00   | 2 | 4.00   | 1 |
| 2 | 4.00 | 2 | 4.00   | 2 | 4.00   | 2 | 4.00   | 1 |
| 2 | 4.00 | 3 | 3.00   | 2 | 4.00   | 3 | 3.00   | 3 |
| 3 | 3.00 | 3 | 3.00   | 3 | 3.00   | 3 | 3.00   | 3 |
| 5 | 1.00 | 2 | 4.00   | 2 | 4.00   | 2 | 4.00   | 5 |
| 3 | 3.00 | 2 | 4.00   | 2 | 4.00   | 2 | 4.00   | 2 |
| 2 | 4.00 | 2 | 4.00   | 2 | 4.00   | 2 | 4.00   | 2 |
| 5 | 1.00 | 3 | 3.00   | 6 | #NULL! | 2 | 4.00   | 5 |
| 4 | 2.00 | 2 | 4.00   | 1 | 5.00   | 1 | 5.00   | 4 |
| 3 | 3.00 | 6 | #NULL! | 6 | #NULL! | 6 | #NULL! | 3 |
| 4 | 2.00 | 1 | 5.00   | 4 | 2.00   | 1 | 5.00   | 5 |
| 4 | 2.00 | 2 | 4.00   | 4 | 2.00   | 4 | 2.00   | 4 |
| 5 | 1.00 | 3 | 3.00   | 6 | #NULL! | 3 | 3.00   | 4 |
| 1 | 5.00 | 2 | 4.00   | 2 | 4.00   | 2 | 4.00   | 2 |
| 2 | 4.00 | 2 | 4.00   | 2 | 4.00   | 2 | 4.00   | 2 |
| 4 | 2.00 | 4 | 2.00   | 3 | 3.00   | 5 | 1.00   | 4 |
| 4 | 2.00 | 6 | #NULL! | 6 | #NULL! | 6 | #NULL! | 5 |
| 5 | 1.00 | 5 | 1.00   | 4 | 2.00   | 4 | 2.00   | 4 |
| 2 | 4.00 | 2 | 4.00   | 2 | 4.00   | 2 | 4.00   | 2 |
| 4 | 2.00 | 2 | 4.00   | 2 | 4.00   | 2 | 4.00   | 5 |

| Social_corr | Recommen | Recommen | Employme | actual_sat | Gender | Age | Age_Recoc | age_grp_d |
|-------------|----------|----------|----------|------------|--------|-----|-----------|-----------|
| 5.00        | 2        | 4.00     | 2        | 4.00       | 1      | 1   | 1         | 1.00      |
| 3.00        | 2        | 4.00     | 2        | 4.00       | 2      | 1   | 1         | 1.00      |
| 1.00        | 5        | 1.00     | 5        | 1.00       | 1      | 1   | 1         | 1.00      |
| 5.00        | 1        | 5.00     | 1        | 5.00       | 1      | 1   | 1         | 1.00      |
| 2.00        | 3        | 3.00     | 2        | 4.00       | 1      | 1   | 1         | 1.00      |
| 5.00        | 2        | 4.00     | 2        | 4.00       | 2      | 1   | 1         | 1.00      |
| 4.00        | 2        | 4.00     | 2        | 4.00       | 1      | 1   | 1         | 1.00      |
| 4.00        | 3        | 3.00     | 2        | 4.00       | 2      | 1   | 1         | 1.00      |
| 4.00        | 2        | 4.00     | 2        | 4.00       | 2      | 1   | 1         | 1.00      |
| 2.00        | 2        | 4.00     | 2        | 4.00       | 2      | 1   | 1         | 1.00      |
| 3.00        | 2        | 4.00     | 2        | 4.00       | 2      | 1   | 1         | 1.00      |
| 3.00        | 1        | 5.00     | 2        | 4.00       | 1      | 1   | 1         | 1.00      |
| 1.00        | 3        | 3.00     | 1        | 5.00       | 1      | 1   | 1         | 1.00      |
| 4.00        | 3        | 3.00     | 3        | 3.00       | 2      | 1   | 1         | 1.00      |
| 2.00        | 2        | 4.00     | 2        | 4.00       | 1      | 1   | 1         | 1.00      |
| 2.00        | 2        | 4.00     | 2        | 4.00       | 1      | 1   | 1         | 1.00      |
| 2.00        | 2        | 4.00     | 2        | 4.00       | 1      | 1   | 1         | 1.00      |
| 4.00        | 2        | 4.00     | 2        | 4.00       | 1      | 1   | 1         | 1.00      |
| 2.00        | 3        | 3.00     | 3        | 3.00       | 1      | 2   | 2         | 0.00      |
| 1.00        | 4        | 2.00     | 5        | 1.00       | 1      | 2   | 2         | 0.00      |
| 3.00        | 3        | 3.00     | 2        | 4.00       | 1      | 2   | 2         | 0.00      |
| 5.00        | 2        | 4.00     | 2        | 4.00       | 2      | 2   | 2         | 0.00      |
| 4.00        | 2        | 4.00     | 1        | 5.00       | 2      | 2   | 2         | 0.00      |
| 3.00        | 3        | 3.00     | 3        | 3.00       | 1      | 2   | 2         | 0.00      |
| 4.00        | 2        | 4.00     | 2        | 4.00       | 1      | 2   | 2         | 0.00      |
| 2.00        | 3        | 3.00     | 3        | 3.00       | 1      | 2   | 2         | 0.00      |
| 1.00        | 4        | 2.00     | 3        | 3.00       | 1      | 2   | 2         | 0.00      |
| 1.00        | 5        | 1.00     | 5        | 1.00       | 2      | 2   | 2         | 0.00      |
| 2.00        | 4        | 2.00     | 2        | 4.00       | 1      | 2   | 2         | 0.00      |
| 2.00        | 5        | 1.00     | 4        | 2.00       | 2      | 2   | 2         | 0.00      |
| 3.00        | 2        | 4.00     | 2        | 4.00       | 2      | 2   | 2         | 0.00      |
| 3.00        | 3        | 3.00     | 2        | 4.00       | 1      | 2   | 2         | 0.00      |
| 3.00        | 5        | 1.00     | 4        | 2.00       | 1      | 2   | 2         | 0.00      |
| 1.00        | 3        | 3.00     | 4        | 2.00       | 1      | 2   | 2         | 0.00      |
| 4.00        | 1        | 5.00     | 1        | 5.00       | 1      | 2   | 2         | 0.00      |
| 4.00        | 5        | 1.00     | 5        | 1.00       | 1      | 2   | 2         | 0.00      |
| 1.00        | 3        | 3.00     | 3        | 3.00       | 1      | 2   | 2         | 0.00      |
| 3.00        | 4        | 2.00     | 3        | 3.00       | 1      | 2   | 2         | 0.00      |
| 5.00        | 2        | 4.00     | 2        | 4.00       | 2      | 2   | 2         | 0.00      |
| 2.00        | 2        | 4.00     | 1        | 5.00       | 2      | 2   | 2         | 0.00      |
| 5.00        | 1        | 5.00     | 1        | 5.00       | 1      | 2   | 2         | 0.00      |
| 2.00        | 2        | 4.00     | 2        | 4.00       | 2      | 2   | 2         | 0.00      |
| 4.00        | 2        | 4.00     | 2        | 4.00       | 1      | 2   | 2         | 0.00      |
| 3.00        | 2        | 4.00     | 2        | 4.00       | 1      | 2   | 2         | 0.00      |
| 1.00        | 3        | 3.00     | 3        | 3.00       | 2      | 2   | 2         | 0.00      |
| 5.00        | 5        | 1.00     | 4        | 2.00       | 1      | 2   | 2         | 0.00      |
| 2.00        | 4        | 2.00     | 3        | 3.00       | 1      | 2   | 2         | 0.00      |
| 2.00        | 3        | 3.00     | 2        | 4.00       | 1      | 2   | 2         | 0.00      |
| 1.00        | 5        | 1.00     | 4        | 2.00       | 1      | 3   | 3         | 0.00      |

|      |   |      |   |      |   |   |   |      |
|------|---|------|---|------|---|---|---|------|
| 1.00 | 5 | 1.00 | 5 | 1.00 | 1 | 3 | 3 | 0.00 |
| 4.00 | 1 | 5.00 | 1 | 5.00 | 2 | 3 | 3 | 0.00 |
| 3.00 | 3 | 3.00 | 3 | 3.00 | 2 | 3 | 3 | 0.00 |
| 1.00 | 3 | 3.00 | 3 | 3.00 | 1 | 3 | 3 | 0.00 |
| 4.00 | 2 | 4.00 | 2 | 4.00 | 1 | 3 | 3 | 0.00 |
| 3.00 | 3 | 3.00 | 2 | 4.00 | 2 | 3 | 3 | 0.00 |
| 2.00 | 3 | 3.00 | 3 | 3.00 | 1 | 3 | 3 | 0.00 |
| 1.00 | 3 | 3.00 | 3 | 3.00 | 1 | 3 | 3 | 0.00 |
| 5.00 | 1 | 5.00 | 1 | 5.00 | 2 | 4 | 3 | 0.00 |
| 5.00 | 2 | 4.00 | 1 | 5.00 | 1 | 4 | 3 | 0.00 |
| 4.00 | 2 | 4.00 | 2 | 4.00 | 1 | 4 | 3 | 0.00 |
| 1.00 | 3 | 3.00 | 5 | 1.00 | 1 | 1 | 1 | 1.00 |
| 3.00 | 1 | 5.00 | 3 | 3.00 | 1 | 1 | 1 | 1.00 |
| 1.00 | 3 | 3.00 | 3 | 3.00 | 1 | 1 | 1 | 1.00 |
| 4.00 | 2 | 4.00 | 1 | 5.00 | 1 | 1 | 1 | 1.00 |
| 4.00 | 2 | 4.00 | 4 | 2.00 | 2 | 1 | 1 | 1.00 |
| 3.00 | 3 | 3.00 | 3 | 3.00 | 2 | 1 | 1 | 1.00 |
| 4.00 | 2 | 4.00 | 3 | 3.00 | 2 | 1 | 1 | 1.00 |
| 4.00 | 2 | 4.00 | 2 | 4.00 | 1 | 2 | 2 | 0.00 |
| 3.00 | 3 | 3.00 | 2 | 4.00 | 1 | 2 | 2 | 0.00 |
| 4.00 | 2 | 4.00 | 2 | 4.00 | 1 | 2 | 2 | 0.00 |
| 3.00 | 3 | 3.00 | 3 | 3.00 | 1 | 2 | 2 | 0.00 |
| 3.00 | 3 | 3.00 | 3 | 3.00 | 1 | 2 | 2 | 0.00 |
| 4.00 | 2 | 4.00 | 2 | 4.00 | 1 | 2 | 2 | 0.00 |
| 1.00 | 4 | 2.00 | 3 | 3.00 | 1 | 2 | 2 | 0.00 |
| 3.00 | 3 | 3.00 | 1 | 5.00 | 1 | 2 | 2 | 0.00 |
| 2.00 | 2 | 4.00 | 2 | 4.00 | 1 | 2 | 2 | 0.00 |
| 2.00 | 4 | 2.00 | 2 | 4.00 | 2 | 2 | 2 | 0.00 |
| 2.00 | 2 | 4.00 | 2 | 4.00 | 1 | 2 | 2 | 0.00 |
| 2.00 | 2 | 4.00 | 1 | 5.00 | 1 | 2 | 2 | 0.00 |
| 1.00 | 4 | 2.00 | 4 | 2.00 | 1 | 2 | 2 | 0.00 |
| 2.00 | 1 | 5.00 | 1 | 5.00 | 1 | 2 | 2 | 0.00 |
| 4.00 | 1 | 5.00 | 1 | 5.00 | 1 | 2 | 2 | 0.00 |
| 2.00 | 4 | 2.00 | 4 | 2.00 | 1 | 2 | 2 | 0.00 |
| 3.00 | 2 | 4.00 | 2 | 4.00 | 1 | 2 | 2 | 0.00 |
| 3.00 | 2 | 4.00 | 1 | 5.00 | 1 | 2 | 2 | 0.00 |
| 2.00 | 3 | 3.00 | 2 | 4.00 | 1 | 2 | 2 | 0.00 |
| 3.00 | 3 | 3.00 | 3 | 3.00 | 1 | 2 | 2 | 0.00 |
| 3.00 | 3 | 3.00 | 3 | 3.00 | 1 | 2 | 2 | 0.00 |
| 1.00 | 2 | 4.00 | 2 | 4.00 | 1 | 2 | 2 | 0.00 |
| 2.00 | 2 | 4.00 | 1 | 5.00 | 1 | 2 | 2 | 0.00 |
| 4.00 | 2 | 4.00 | 2 | 4.00 | 1 | 2 | 2 | 0.00 |
| 2.00 | 3 | 3.00 | 2 | 4.00 | 1 | 2 | 2 | 0.00 |
| 4.00 | 1 | 5.00 | 3 | 3.00 | 1 | 2 | 2 | 0.00 |
| 4.00 | 2 | 4.00 | 2 | 4.00 | 1 | 2 | 2 | 0.00 |
| 1.00 | 5 | 1.00 | 5 | 1.00 | 1 | 2 | 2 | 0.00 |
| 4.00 | 2 | 4.00 | 2 | 4.00 | 1 | 2 | 2 | 0.00 |
| 1.00 | 3 | 3.00 | 3 | 3.00 | 1 | 2 | 2 | 0.00 |
| 2.00 | 3 | 3.00 | 3 | 3.00 | 1 | 2 | 2 | 0.00 |
| 3.00 | 5 | 1.00 | 4 | 2.00 | 1 | 2 | 2 | 0.00 |

|      |   |      |   |      |   |   |   |      |
|------|---|------|---|------|---|---|---|------|
| 3.00 | 2 | 4.00 | 2 | 4.00 | 1 | 2 | 2 | 0.00 |
| 2.00 | 3 | 3.00 | 2 | 4.00 | 1 | 2 | 2 | 0.00 |
| 4.00 | 4 | 2.00 | 5 | 1.00 | 1 | 2 | 2 | 0.00 |
| 2.00 | 2 | 4.00 | 2 | 4.00 | 1 | 2 | 2 | 0.00 |
| 1.00 | 2 | 4.00 | 2 | 4.00 | 1 | 3 | 3 | 0.00 |
| 4.00 | 2 | 4.00 | 2 | 4.00 | 1 | 3 | 3 | 0.00 |
| 2.00 | 2 | 4.00 | 2 | 4.00 | 1 | 3 | 3 | 0.00 |
| 4.00 | 2 | 4.00 | 3 | 3.00 | 1 | 3 | 3 | 0.00 |
| 1.00 | 3 | 3.00 | 3 | 3.00 | 1 | 3 | 3 | 0.00 |
| 3.00 | 3 | 3.00 | 2 | 4.00 | 1 | 3 | 3 | 0.00 |
| 4.00 | 2 | 4.00 | 2 | 4.00 | 1 | 3 | 3 | 0.00 |
| 4.00 | 2 | 4.00 | 2 | 4.00 | 2 | 3 | 3 | 0.00 |
| 4.00 | 2 | 4.00 | 1 | 5.00 | 1 | 3 | 3 | 0.00 |
| 4.00 | 2 | 4.00 | 1 | 5.00 | 1 | 3 | 3 | 0.00 |
| 2.00 | 2 | 4.00 | 2 | 4.00 | 1 | 3 | 3 | 0.00 |
| 3.00 | 2 | 4.00 | 2 | 4.00 | 1 | 4 | 3 | 0.00 |
| 5.00 | 1 | 5.00 | 1 | 5.00 | 1 | 4 | 3 | 0.00 |
| 3.00 | 3 | 3.00 | 2 | 4.00 | 1 | 4 | 3 | 0.00 |
| 2.00 | 4 | 2.00 | 4 | 2.00 | 1 | 1 | 1 | 1.00 |
| 4.00 | 3 | 3.00 | 2 | 4.00 | 1 | 1 | 1 | 1.00 |
| 4.00 | 3 | 3.00 | 3 | 3.00 | 1 | 3 | 3 | 0.00 |
| 3.00 | 3 | 3.00 | 3 | 3.00 | 1 | 2 | 2 | 0.00 |
| 4.00 | 3 | 3.00 | 3 | 3.00 | 1 | 3 | 3 | 0.00 |
| 3.00 | 3 | 3.00 | 2 | 4.00 | 1 | 1 | 1 | 1.00 |
| 5.00 | 1 | 5.00 | 2 | 4.00 | 2 | 2 | 2 | 0.00 |
| 5.00 | 2 | 4.00 | 2 | 4.00 | 2 | 2 | 2 | 0.00 |
| 3.00 | 1 | 5.00 | 3 | 3.00 | 1 | 3 | 3 | 0.00 |
| 3.00 | 2 | 4.00 | 3 | 3.00 | 1 | 3 | 3 | 0.00 |
| 1.00 | 5 | 1.00 | 4 | 2.00 | 1 | 3 | 3 | 0.00 |
| 4.00 | 3 | 3.00 | 3 | 3.00 | 1 | 1 | 1 | 1.00 |
| 4.00 | 1 | 5.00 | 1 | 5.00 | 2 | 2 | 2 | 0.00 |
| 1.00 | 5 | 1.00 | 5 | 1.00 | 2 | 2 | 2 | 0.00 |
| 2.00 | 3 | 3.00 | 2 | 4.00 | 2 | 3 | 3 | 0.00 |
| 3.00 | 2 | 4.00 | 2 | 4.00 | 1 | 3 | 3 | 0.00 |
| 1.00 | 2 | 4.00 | 1 | 5.00 | 2 | 3 | 3 | 0.00 |
| 2.00 | 3 | 3.00 | 2 | 4.00 | 2 | 3 | 3 | 0.00 |
| 2.00 | 4 | 2.00 | 5 | 1.00 | 1 | 1 | 1 | 1.00 |
| 4.00 | 2 | 4.00 | 2 | 4.00 | 1 | 1 | 1 | 1.00 |
| 4.00 | 3 | 3.00 | 2 | 4.00 | 1 | 1 | 1 | 1.00 |
| 2.00 | 5 | 1.00 | 5 | 1.00 | 1 | 1 | 1 | 1.00 |
| 1.00 | 5 | 1.00 | 5 | 1.00 | 1 | 2 | 2 | 0.00 |
| 2.00 | 5 | 1.00 | 5 | 1.00 | 2 | 2 | 2 | 0.00 |
| 4.00 | 2 | 4.00 | 2 | 4.00 | 1 | 2 | 2 | 0.00 |
| 1.00 | 5 | 1.00 | 4 | 2.00 | 1 | 3 | 3 | 0.00 |

| age_grp_d | age_grp_d | Marital_st | Marital_st | MS_grp_d | MS_grp_d | MS_grp_d | Education | Education |
|-----------|-----------|------------|------------|----------|----------|----------|-----------|-----------|
| 0.00      | 0.00      | 2          | 2          | 0.00     | 1.00     | 0.00     | 2         | 2         |
| 0.00      | 0.00      | 2          | 2          | 0.00     | 1.00     | 0.00     | 2         | 2         |
| 0.00      | 0.00      | 1          | 1          | 1.00     | 0.00     | 0.00     | 2         | 2         |
| 0.00      | 0.00      | 1          | 1          | 1.00     | 0.00     | 0.00     | 2         | 2         |
| 0.00      | 0.00      | 1          | 1          | 1.00     | 0.00     | 0.00     | 2         | 2         |
| 0.00      | 0.00      | 2          | 2          | 0.00     | 1.00     | 0.00     | 2         | 2         |
| 0.00      | 0.00      | 2          | 2          | 0.00     | 1.00     | 0.00     | 4         | 3         |
| 0.00      | 0.00      | 1          | 1          | 1.00     | 0.00     | 0.00     | 2         | 2         |
| 0.00      | 0.00      | 1          | 1          | 1.00     | 0.00     | 0.00     | 2         | 2         |
| 0.00      | 0.00      | 1          | 1          | 1.00     | 0.00     | 0.00     | 2         | 2         |
| 0.00      | 0.00      | 1          | 1          | 1.00     | 0.00     | 0.00     | 2         | 2         |
| 0.00      | 0.00      | 1          | 1          | 1.00     | 0.00     | 0.00     | 2         | 2         |
| 0.00      | 0.00      | 2          | 2          | 0.00     | 1.00     | 0.00     | 2         | 2         |
| 0.00      | 0.00      | 1          | 1          | 1.00     | 0.00     | 0.00     | 2         | 2         |
| 0.00      | 0.00      | 2          | 2          | 0.00     | 1.00     | 0.00     | 2         | 2         |
| 0.00      | 0.00      | 2          | 2          | 0.00     | 1.00     | 0.00     | 2         | 2         |
| 0.00      | 0.00      | 2          | 2          | 0.00     | 1.00     | 0.00     | 2         | 2         |
| 0.00      | 0.00      | 2          | 2          | 0.00     | 1.00     | 0.00     | 2         | 2         |
| 0.00      | 0.00      | 3          | 3          | 0.00     | 0.00     | 1.00     | 2         | 2         |
| 1.00      | 0.00      | 2          | 2          | 0.00     | 1.00     | 0.00     | 2         | 2         |
| 1.00      | 0.00      | 2          | 2          | 0.00     | 1.00     | 0.00     | 1         | 1         |
| 1.00      | 0.00      | 2          | 2          | 0.00     | 1.00     | 0.00     | 4         | 3         |
| 1.00      | 0.00      | 2          | 2          | 0.00     | 1.00     | 0.00     | 4         | 3         |
| 1.00      | 0.00      | 2          | 2          | 0.00     | 1.00     | 0.00     | 2         | 2         |
| 1.00      | 0.00      | 4          | 3          | 0.00     | 0.00     | 1.00     | 2         | 2         |
| 1.00      | 0.00      | 1          | 1          | 1.00     | 0.00     | 0.00     | 2         | 2         |
| 1.00      | 0.00      | 2          | 2          | 0.00     | 1.00     | 0.00     | 2         | 2         |
| 1.00      | 0.00      | 2          | 2          | 0.00     | 1.00     | 0.00     | 4         | 3         |
| 1.00      | 0.00      | 2          | 2          | 0.00     | 1.00     | 0.00     | 2         | 2         |
| 1.00      | 0.00      | 2          | 2          | 0.00     | 1.00     | 0.00     | 3         | 3         |
| 1.00      | 0.00      | 1          | 1          | 1.00     | 0.00     | 0.00     | 4         | 3         |
| 1.00      | 0.00      | 2          | 2          | 0.00     | 1.00     | 0.00     | 4         | 3         |
| 1.00      | 0.00      | 2          | 2          | 0.00     | 1.00     | 0.00     | 2         | 2         |
| 1.00      | 0.00      | 2          | 2          | 0.00     | 1.00     | 0.00     | 4         | 3         |
| 1.00      | 0.00      | 2          | 2          | 0.00     | 1.00     | 0.00     | 2         | 2         |
| 1.00      | 0.00      | 2          | 2          | 0.00     | 1.00     | 0.00     | 2         | 2         |
| 1.00      | 0.00      | 2          | 2          | 0.00     | 1.00     | 0.00     | 2         | 2         |
| 1.00      | 0.00      | 2          | 2          | 0.00     | 1.00     | 0.00     | 2         | 2         |
| 1.00      | 0.00      | 2          | 2          | 0.00     | 1.00     | 0.00     | 4         | 3         |
| 1.00      | 0.00      | 2          | 2          | 0.00     | 1.00     | 0.00     | 2         | 2         |
| 1.00      | 0.00      | 2          | 2          | 0.00     | 1.00     | 0.00     | 2         | 2         |
| 1.00      | 0.00      | 2          | 2          | 0.00     | 1.00     | 0.00     | 2         | 2         |
| 1.00      | 0.00      | 2          | 2          | 0.00     | 1.00     | 0.00     | 2         | 2         |
| 1.00      | 0.00      | 2          | 2          | 0.00     | 1.00     | 0.00     | 4         | 3         |
| 1.00      | 0.00      | 2          | 2          | 0.00     | 1.00     | 0.00     | 2         | 2         |
| 1.00      | 0.00      | 3          | 3          | 0.00     | 0.00     | 1.00     | 2         | 2         |
| 1.00      | 0.00      | 2          | 2          | 0.00     | 1.00     | 0.00     | 2         | 2         |
| 1.00      | 0.00      | 2          | 2          | 0.00     | 1.00     | 0.00     | 2         | 2         |
| 1.00      | 0.00      | 2          | 2          | 0.00     | 1.00     | 0.00     | 3         | 3         |
| 1.00      | 0.00      | 2          | 2          | 0.00     | 1.00     | 0.00     | 4         | 3         |
| 1.00      | 0.00      | 2          | 2          | 0.00     | 1.00     | 0.00     | 2         | 2         |
| 0.00      | 1.00      | 2          | 2          | 0.00     | 1.00     | 0.00     | 2         | 2         |





|      |      |   |   |      |      |      |   |   |
|------|------|---|---|------|------|------|---|---|
| 1.00 | 0.00 | 2 | 2 | 0.00 | 1.00 | 0.00 | 1 | 1 |
| 1.00 | 0.00 | 2 | 2 | 0.00 | 1.00 | 0.00 | 1 | 1 |
| 1.00 | 0.00 | 1 | 1 | 1.00 | 0.00 | 0.00 | 2 | 2 |
| 1.00 | 0.00 | 2 | 2 | 0.00 | 1.00 | 0.00 | 3 | 3 |
| 0.00 | 1.00 | 3 | 3 | 0.00 | 0.00 | 1.00 | 1 | 1 |
| 0.00 | 1.00 | 1 | 1 | 1.00 | 0.00 | 0.00 | 1 | 1 |
| 0.00 | 1.00 | 2 | 2 | 0.00 | 1.00 | 0.00 | 1 | 1 |
| 0.00 | 1.00 | 2 | 2 | 0.00 | 1.00 | 0.00 | 1 | 1 |
| 0.00 | 1.00 | 2 | 2 | 0.00 | 1.00 | 0.00 | 2 | 2 |
| 0.00 | 1.00 | 3 | 3 | 0.00 | 0.00 | 1.00 | 1 | 1 |
| 0.00 | 1.00 | 2 | 2 | 0.00 | 1.00 | 0.00 | 1 | 1 |
| 0.00 | 1.00 | 2 | 2 | 0.00 | 1.00 | 0.00 | 1 | 1 |
| 0.00 | 1.00 | 1 | 1 | 1.00 | 0.00 | 0.00 | 1 | 1 |
| 0.00 | 1.00 | 2 | 2 | 0.00 | 1.00 | 0.00 | 1 | 1 |
| 0.00 | 1.00 | 2 | 2 | 0.00 | 1.00 | 0.00 | 1 | 1 |
| 0.00 | 1.00 | 2 | 2 | 0.00 | 1.00 | 0.00 | 2 | 2 |
| 0.00 | 1.00 | 2 | 2 | 0.00 | 1.00 | 0.00 | 1 | 1 |
| 0.00 | 1.00 | 2 | 2 | 0.00 | 1.00 | 0.00 | 1 | 1 |
| 0.00 | 0.00 | 2 | 2 | 0.00 | 1.00 | 0.00 | 2 | 2 |
| 0.00 | 0.00 | 1 | 1 | 1.00 | 0.00 | 0.00 | 2 | 2 |
| 0.00 | 1.00 | 2 | 2 | 0.00 | 1.00 | 0.00 | 1 | 1 |
| 1.00 | 0.00 | 2 | 2 | 0.00 | 1.00 | 0.00 | 2 | 2 |
| 0.00 | 1.00 | 2 | 2 | 0.00 | 1.00 | 0.00 | 2 | 2 |
| 0.00 | 0.00 | 2 | 2 | 0.00 | 1.00 | 0.00 | 2 | 2 |
| 1.00 | 0.00 | 2 | 2 | 0.00 | 1.00 | 0.00 | 2 | 2 |
| 1.00 | 0.00 | 2 | 2 | 0.00 | 1.00 | 0.00 | 3 | 3 |
| 0.00 | 1.00 | 2 | 2 | 0.00 | 1.00 | 0.00 | 1 | 1 |
| 0.00 | 1.00 | 2 | 2 | 0.00 | 1.00 | 0.00 | 2 | 2 |
| 0.00 | 1.00 | 3 | 3 | 0.00 | 0.00 | 1.00 | 3 | 3 |
| 0.00 | 0.00 | 1 | 1 | 1.00 | 0.00 | 0.00 | 2 | 2 |
| 1.00 | 0.00 | 2 | 2 | 0.00 | 1.00 | 0.00 | 1 | 1 |
| 1.00 | 0.00 | 2 | 2 | 0.00 | 1.00 | 0.00 | 2 | 2 |
| 0.00 | 1.00 | 2 | 2 | 0.00 | 1.00 | 0.00 | 1 | 1 |
| 0.00 | 1.00 | 2 | 2 | 0.00 | 1.00 | 0.00 | 4 | 3 |
| 0.00 | 1.00 | 2 | 2 | 0.00 | 1.00 | 0.00 | 1 | 1 |
| 0.00 | 1.00 | 2 | 2 | 0.00 | 1.00 | 0.00 | 1 | 1 |
| 0.00 | 0.00 | 3 | 3 | 0.00 | 0.00 | 1.00 | 3 | 3 |
| 0.00 | 0.00 | 2 | 2 | 0.00 | 1.00 | 0.00 | 3 | 3 |
| 0.00 | 0.00 | 2 | 2 | 0.00 | 1.00 | 0.00 | 2 | 2 |
| 0.00 | 0.00 | 2 | 2 | 0.00 | 1.00 | 0.00 | 3 | 3 |
| 1.00 | 0.00 | 2 | 2 | 0.00 | 1.00 | 0.00 | 2 | 2 |
| 1.00 | 0.00 | 2 | 2 | 0.00 | 1.00 | 0.00 | 2 | 2 |
| 1.00 | 0.00 | 2 | 2 | 0.00 | 1.00 | 0.00 | 2 | 2 |
| 0.00 | 1.00 | 2 | 2 | 0.00 | 1.00 | 0.00 | 2 | 2 |







| sp_grp_d | Years_exp | year_grp_c | year_grp_c | year_grp_c | year_grp_c | Salaryrang | sal_grp_d | sal_grp_d |
|----------|-----------|------------|------------|------------|------------|------------|-----------|-----------|
| 0.00     | 2         | 0.00       | 1.00       | 0.00       | 0.00       | 2          | 0.00      | 1.00      |
| 0.00     | 2         | 0.00       | 1.00       | 0.00       | 0.00       | 2          | 0.00      | 1.00      |
| 0.00     | 1         | 1.00       | 0.00       | 0.00       | 0.00       | 2          | 0.00      | 1.00      |
| 0.00     | 3         | 0.00       | 0.00       | 1.00       | 0.00       | 2          | 0.00      | 1.00      |
| 0.00     | 1         | 1.00       | 0.00       | 0.00       | 0.00       | 2          | 0.00      | 1.00      |
| 0.00     | 2         | 0.00       | 1.00       | 0.00       | 0.00       | 1          | 1.00      | 0.00      |
| 0.00     | 2         | 0.00       | 1.00       | 0.00       | 0.00       | 2          | 0.00      | 1.00      |
| 0.00     | 2         | 0.00       | 1.00       | 0.00       | 0.00       | 2          | 0.00      | 1.00      |
| 0.00     | 1         | 1.00       | 0.00       | 0.00       | 0.00       | 3          | 0.00      | 0.00      |
| 0.00     | 1         | 1.00       | 0.00       | 0.00       | 0.00       | 3          | 0.00      | 0.00      |
| 0.00     | 1         | 1.00       | 0.00       | 0.00       | 0.00       | 3          | 0.00      | 0.00      |
| 0.00     | 1         | 1.00       | 0.00       | 0.00       | 0.00       | 2          | 0.00      | 1.00      |
| 0.00     | 2         | 0.00       | 1.00       | 0.00       | 0.00       | 2          | 0.00      | 1.00      |
| 0.00     | 1         | 1.00       | 0.00       | 0.00       | 0.00       | 2          | 0.00      | 1.00      |
| 0.00     | 2         | 0.00       | 1.00       | 0.00       | 0.00       | 2          | 0.00      | 1.00      |
| 0.00     | 2         | 0.00       | 1.00       | 0.00       | 0.00       | 2          | 0.00      | 1.00      |
| 0.00     | 2         | 0.00       | 1.00       | 0.00       | 0.00       | 2          | 0.00      | 1.00      |
| 0.00     | 1         | 1.00       | 0.00       | 0.00       | 0.00       | 2          | 0.00      | 1.00      |
| 0.00     | 4         | 0.00       | 0.00       | 0.00       | 1.00       | 3          | 0.00      | 0.00      |
| 0.00     | 2         | 0.00       | 1.00       | 0.00       | 0.00       | 1          | 1.00      | 0.00      |
| 0.00     | 4         | 0.00       | 0.00       | 0.00       | 1.00       | 3          | 0.00      | 0.00      |
| 0.00     | 3         | 0.00       | 0.00       | 1.00       | 0.00       | 2          | 0.00      | 1.00      |
| 0.00     | 3         | 0.00       | 0.00       | 1.00       | 0.00       | 3          | 0.00      | 0.00      |
| 0.00     | 4         | 0.00       | 0.00       | 0.00       | 1.00       | 3          | 0.00      | 0.00      |
| 0.00     | 4         | 0.00       | 0.00       | 0.00       | 1.00       | 3          | 0.00      | 0.00      |
| 0.00     | 4         | 0.00       | 0.00       | 0.00       | 1.00       | 3          | 0.00      | 0.00      |
| 0.00     | 2         | 0.00       | 1.00       | 0.00       | 0.00       | 3          | 0.00      | 0.00      |
| 0.00     | 3         | 0.00       | 0.00       | 1.00       | 0.00       | 3          | 0.00      | 0.00      |
| 0.00     | 4         | 0.00       | 0.00       | 0.00       | 1.00       | 3          | 0.00      | 0.00      |
| 0.00     | 2         | 0.00       | 1.00       | 0.00       | 0.00       | 2          | 0.00      | 1.00      |
| 0.00     | 3         | 0.00       | 0.00       | 1.00       | 0.00       | 3          | 0.00      | 0.00      |
| 0.00     | 3         | 0.00       | 0.00       | 1.00       | 0.00       | 3          | 0.00      | 0.00      |
| 0.00     | 3         | 0.00       | 0.00       | 1.00       | 0.00       | 3          | 0.00      | 0.00      |
| 0.00     | 3         | 0.00       | 0.00       | 1.00       | 0.00       | 3          | 0.00      | 0.00      |
| 0.00     | 3         | 0.00       | 0.00       | 1.00       | 0.00       | 3          | 0.00      | 0.00      |
| 0.00     | 3         | 0.00       | 0.00       | 1.00       | 0.00       | 3          | 0.00      | 0.00      |
| 0.00     | 4         | 0.00       | 0.00       | 0.00       | 1.00       | 3          | 0.00      | 0.00      |
| 0.00     | 4         | 0.00       | 0.00       | 0.00       | 1.00       | 3          | 0.00      | 0.00      |
| 0.00     | 2         | 0.00       | 1.00       | 0.00       | 0.00       | 3          | 0.00      | 0.00      |
| 0.00     | 4         | 0.00       | 0.00       | 0.00       | 1.00       | 3          | 0.00      | 0.00      |
| 0.00     | 4         | 0.00       | 0.00       | 0.00       | 1.00       | 3          | 0.00      | 0.00      |
| 0.00     | 4         | 0.00       | 0.00       | 0.00       | 1.00       | 3          | 0.00      | 0.00      |
| 0.00     | 3         | 0.00       | 0.00       | 1.00       | 0.00       | 3          | 0.00      | 0.00      |
| 0.00     | 4         | 0.00       | 0.00       | 0.00       | 1.00       | 2          | 0.00      | 1.00      |
| 0.00     | 4         | 0.00       | 0.00       | 0.00       | 1.00       | 2          | 0.00      | 1.00      |
| 0.00     | 2         | 0.00       | 1.00       | 0.00       | 0.00       | 3          | 0.00      | 0.00      |
| 0.00     | 3         | 0.00       | 0.00       | 1.00       | 0.00       | 3          | 0.00      | 0.00      |
| 0.00     | 4         | 0.00       | 0.00       | 0.00       | 1.00       | 2          | 0.00      | 1.00      |
| 0.00     | 4         | 0.00       | 0.00       | 0.00       | 1.00       | 3          | 0.00      | 0.00      |





| sal_grp_d | GeographicCity | Distance | Working_s | shift_grp_c | shift_grp_c | shift_grp_c | Hoursofwc |
|-----------|----------------|----------|-----------|-------------|-------------|-------------|-----------|
| 0.00      | 1              | 2        | 1         | 1.00        | 0.00        | 0.00        | 2         |
| 0.00      | 1              | 1        | 1         | 1.00        | 0.00        | 0.00        | 1         |
| 0.00      | 1              | 1        | 1         | 1.00        | 0.00        | 0.00        | 1         |
| 0.00      | 1              | 1        | 1         | 1.00        | 0.00        | 0.00        | 1         |
| 0.00      | 1              | 1        | 1         | 1.00        | 0.00        | 0.00        | 1         |
| 0.00      | 1              | 2        | 1         | 1.00        | 0.00        | 0.00        | 1         |
| 0.00      | 1              | 2        | 1         | 1.00        | 0.00        | 0.00        | 1         |
| 0.00      | 1              | 2        | 1         | 1.00        | 0.00        | 0.00        | 1         |
| 1.00      | 1              | 3        | 1         | 1.00        | 0.00        | 0.00        | 1         |
| 1.00      | 1              | 4        | 1         | 1.00        | 0.00        | 0.00        | 1         |
| 1.00      | 1              | 4        | 1         | 1.00        | 0.00        | 0.00        | 1         |
| 0.00      | 1              | 3        | 1         | 1.00        | 0.00        | 0.00        | 1         |
| 0.00      | 1              | 3        | 1         | 1.00        | 0.00        | 0.00        | 1         |
| 0.00      | 1 Alahsa       | 2        | 3         | 0.00        | 0.00        | 1.00        | 1         |
| 0.00      | 1 Ras tanura   | 3        | 1         | 1.00        | 0.00        | 0.00        | 1         |
| 0.00      | 1 Dammam       | 1        | 1         | 1.00        | 0.00        | 0.00        | 1         |
| 0.00      | 1 Bugaig       | 4        | 1         | 1.00        | 0.00        | 0.00        | 1         |
| 0.00      | 1 Bugaig       | 4        | 1         | 1.00        | 0.00        | 0.00        | 1         |
| 1.00      | 1 Ras tanura   | 2        | 1         | 1.00        | 0.00        | 0.00        | 1         |
| 0.00      | 1              | 1        | 1         | 1.00        | 0.00        | 0.00        | 1         |
| 1.00      | 1              | 2        | 1         | 1.00        | 0.00        | 0.00        | 1         |
| 0.00      | 1              | 1        | 1         | 1.00        | 0.00        | 0.00        | 1         |
| 1.00      | 1              | 4        | 1         | 1.00        | 0.00        | 0.00        | 1         |
| 1.00      | 1              | 3        | 1         | 1.00        | 0.00        | 0.00        | 1         |
| 1.00      | 1              | 3        | 1         | 1.00        | 0.00        | 0.00        | 1         |
| 1.00      | 1              | 2        | 1         | 1.00        | 0.00        | 0.00        | 1         |
| 1.00      | 1              | 2        | 1         | 1.00        | 0.00        | 0.00        | 1         |
| 1.00      | 1              | 2        | 1         | 1.00        | 0.00        | 0.00        | 1         |
| 1.00      | 1              | 1        | 1         | 1.00        | 0.00        | 0.00        | 1         |
| 0.00      | 1              | 1        | 1         | 1.00        | 0.00        | 0.00        | 1         |
| 1.00      | 1 Alkhobar     | 2        | 1         | 1.00        | 0.00        | 0.00        | 1         |
| 1.00      | 1 Alqatif      | 2        | 1         | 1.00        | 0.00        | 0.00        | 1         |
| 1.00      | 1 Alqatif      | 1        | 1         | 1.00        | 0.00        | 0.00        | 1         |
| 1.00      | 1 Alqatif      | 2        | 1         | 1.00        | 0.00        | 0.00        | 1         |
| 1.00      | 1              | 3        | 1         | 1.00        | 0.00        | 0.00        | 1         |
| 1.00      | 1 Alsafwa      | 2        | 1         | 1.00        | 0.00        | 0.00        | 1         |
| 1.00      | 1 Alsafwa      | 3        | 1         | 1.00        | 0.00        | 0.00        | 1         |
| 1.00      | 1 Alshargia    | 2        | 1         | 1.00        | 0.00        | 0.00        | 1         |
| 1.00      | 1 Alsafwa      | 2        | 1         | 1.00        | 0.00        | 0.00        | 1         |
| 1.00      | 1 Ras tanura   | 2        | 1         | 1.00        | 0.00        | 0.00        | 1         |
| 1.00      | 1 Ras tanura   | 3        | 1         | 1.00        | 0.00        | 0.00        | 1         |
| 1.00      | 1 Bogaig       | 4        | 3         | 0.00        | 0.00        | 1.00        | 1         |
| 1.00      | 1 Alkhobar     | 3        | 1         | 1.00        | 0.00        | 0.00        | 1         |
| 0.00      | 1 Dammam       | 3        | 1         | 1.00        | 0.00        | 0.00        | 1         |
| 0.00      | 1 Dammam       | 1        | 1         | 1.00        | 0.00        | 0.00        | 1         |
| 1.00      | 1 Dammam       | 2        | 1         | 1.00        | 0.00        | 0.00        | 1         |
| 1.00      | 1              | 2        | 1         | 1.00        | 0.00        | 0.00        | 1         |
| 0.00      | 1 Dammam       | 3        | 1         | 1.00        | 0.00        | 0.00        | 1         |
| 1.00      | 1              | 1        | 1         | 1.00        | 0.00        | 0.00        | 1         |



|      |              |   |   |      |      |      |   |
|------|--------------|---|---|------|------|------|---|
| 1.00 | 1            | 1 | 1 | 1.00 | 0.00 | 0.00 | 1 |
| 0.00 | 1            | 1 | 1 | 1.00 | 0.00 | 0.00 | 1 |
| 1.00 | 1 abqaiq     | 4 | 1 | 1.00 | 0.00 | 0.00 | 1 |
| 1.00 | 1 AbuMan     | 3 | 1 | 1.00 | 0.00 | 0.00 | 1 |
| 0.00 | 1 Bugaig     | 4 | 1 | 1.00 | 0.00 | 0.00 | 1 |
| 0.00 | 1 Bugaig     | 1 | 3 | 0.00 | 0.00 | 1.00 | 1 |
| 0.00 | 1 Dammam     | 1 | 1 | 1.00 | 0.00 | 0.00 | 1 |
| 0.00 | 1 Dammam     | 3 | 3 | 0.00 | 0.00 | 1.00 | 1 |
| 0.00 | 1 alrafiah   | 1 | 1 | 1.00 | 0.00 | 0.00 | 1 |
| 0.00 | 1            | 1 | 3 | 0.00 | 0.00 | 1.00 | 1 |
| 0.00 | 1            | 1 | 1 | 1.00 | 0.00 | 0.00 | 1 |
| 0.00 | 1            | 2 | 3 | 0.00 | 0.00 | 1.00 | 2 |
| 0.00 | 1            | 2 | 1 | 1.00 | 0.00 | 0.00 | 1 |
| 0.00 | 1 Alsafwa    | 2 | 3 | 0.00 | 0.00 | 1.00 | 1 |
| 0.00 | 1            | 3 | 1 | 1.00 | 0.00 | 0.00 | 1 |
| 0.00 | 1 Dammam     | 3 | 1 | 1.00 | 0.00 | 0.00 | 1 |
| 0.00 | 1 Dammam     | 3 | 1 | 1.00 | 0.00 | 0.00 | 1 |
| 0.00 | 1 Dammam     | 4 | 1 | 1.00 | 0.00 | 0.00 | 1 |
| 0.00 | 1 Ras tanura | 3 | 1 | 1.00 | 0.00 | 0.00 | 1 |
| 0.00 | 1 Ras tanura | 3 | 1 | 1.00 | 0.00 | 0.00 | 1 |
| 0.00 | 1            | 2 | 1 | 1.00 | 0.00 | 0.00 | 1 |
| 0.00 | 1            | 2 | 2 | 0.00 | 1.00 | 0.00 | 1 |
| 0.00 | 1            | 3 | 1 | 1.00 | 0.00 | 0.00 | 1 |
| 0.00 | 1            | 2 | 1 | 1.00 | 0.00 | 0.00 | 1 |
| 0.00 | 1            | 1 | 1 | 1.00 | 0.00 | 0.00 | 1 |
| 0.00 | 1            | 3 | 1 | 1.00 | 0.00 | 0.00 | 1 |
| 0.00 | 1 Alqatif    | 1 | 1 | 1.00 | 0.00 | 0.00 | 1 |
| 0.00 | 1 Alqatif    | 1 | 1 | 1.00 | 0.00 | 0.00 | 1 |
| 0.00 | 1 Alqatif    | 1 | 1 | 1.00 | 0.00 | 0.00 | 1 |
| 0.00 | 1 Alqatif    | 2 | 1 | 1.00 | 0.00 | 0.00 | 1 |
| 0.00 | 1 Bugaig     | 4 | 1 | 1.00 | 0.00 | 0.00 | 1 |
| 0.00 | 1 Alsafwa    | 3 | 1 | 1.00 | 0.00 | 0.00 | 1 |
| 0.00 | 1 Alsafwa    | 2 | 1 | 1.00 | 0.00 | 0.00 | 1 |
| 0.00 | 1 Alsafwa    | 1 | 1 | 1.00 | 0.00 | 0.00 | 1 |
| 0.00 | 1 Alsafwa    | 1 | 1 | 1.00 | 0.00 | 0.00 | 1 |
| 0.00 | 1 Alsafwa    | 1 | 1 | 1.00 | 0.00 | 0.00 | 1 |
| 0.00 | 1            | 4 | 1 | 1.00 | 0.00 | 0.00 | 1 |
| 0.00 | 1 Dammam     | 3 | 1 | 1.00 | 0.00 | 0.00 | 1 |
| 0.00 | 1 Dammam     | 4 | 1 | 1.00 | 0.00 | 0.00 | 1 |
| 0.00 | 1 Alsafwa    | 3 | 3 | 0.00 | 0.00 | 1.00 | 1 |
| 0.00 | 1 Ras tanura | 1 | 1 | 1.00 | 0.00 | 0.00 | 1 |
| 0.00 | 1 Ras tanura | 3 | 1 | 1.00 | 0.00 | 0.00 | 1 |
| 0.00 | 1 Ras tanura | 2 | 1 | 1.00 | 0.00 | 0.00 | 1 |
| 0.00 | 1            | 4 | 1 | 1.00 | 0.00 | 0.00 | 1 |
| 0.00 | 1 Bugaig     | 4 | 1 | 1.00 | 0.00 | 0.00 | 1 |
| 0.00 | 1            | 4 | 1 | 1.00 | 0.00 | 0.00 | 1 |
| 0.00 | 1 Alkhobar   | 2 | 1 | 1.00 | 0.00 | 0.00 | 1 |
| 0.00 | 1 Dammam     | 2 | 1 | 1.00 | 0.00 | 0.00 | 1 |
| 0.00 | 1            | 3 | 1 | 1.00 | 0.00 | 0.00 | 1 |
| 0.00 | 1 Dammam     | 3 | 1 | 1.00 | 0.00 | 0.00 | 1 |

|      |             |   |   |      |      |      |   |
|------|-------------|---|---|------|------|------|---|
| 0.00 | 1 Dammam    | 2 | 1 | 1.00 | 0.00 | 0.00 | 1 |
| 0.00 | 1 Dammam    | 3 | 1 | 1.00 | 0.00 | 0.00 | 1 |
| 0.00 | 1 Dammam    | 3 | 1 | 1.00 | 0.00 | 0.00 | 1 |
| 0.00 | 1 Dammam    | 4 | 1 | 1.00 | 0.00 | 0.00 | 1 |
| 0.00 | 1 Alsafwa   | 1 | 1 | 1.00 | 0.00 | 0.00 | 1 |
| 0.00 | 1           | 4 | 1 | 1.00 | 0.00 | 0.00 | 1 |
| 0.00 | 1           | 2 | 1 | 1.00 | 0.00 | 0.00 | 1 |
| 0.00 | 1           | 2 | 1 | 1.00 | 0.00 | 0.00 | 1 |
| 0.00 | 1 Alqatif   | 1 | 1 | 1.00 | 0.00 | 0.00 | 1 |
| 0.00 | 1 Alqatif   | 1 | 1 | 1.00 | 0.00 | 0.00 | 1 |
| 0.00 | 1           | 2 | 1 | 1.00 | 0.00 | 0.00 | 1 |
| 0.00 | 1 Bugaig    | 4 | 1 | 1.00 | 0.00 | 0.00 | 1 |
| 0.00 | 1 Alsafwa   | 1 | 1 | 1.00 | 0.00 | 0.00 | 1 |
| 0.00 | 1 Um Alsaht | 2 | 1 | 1.00 | 0.00 | 0.00 | 1 |
| 0.00 | 1 Alsafwa   | 2 | 1 | 1.00 | 0.00 | 0.00 | 1 |
| 0.00 | 1           | 1 | 1 | 1.00 | 0.00 | 0.00 | 1 |
| 1.00 | 1           | 1 | 2 | 0.00 | 1.00 | 0.00 | 1 |
| 1.00 | 1 Alqatif   | 2 | 1 | 1.00 | 0.00 | 0.00 | 1 |
| 0.00 | 1           | 2 | 1 | 1.00 | 0.00 | 0.00 | 1 |
| 0.00 | 1           | 1 | 1 | 1.00 | 0.00 | 0.00 | 1 |
| 0.00 | 1 Alsafwa   | 1 | 2 | 0.00 | 1.00 | 0.00 | 1 |
| 0.00 | 1 Dammam    | 3 | 1 | 1.00 | 0.00 | 0.00 | 1 |
| 0.00 | 1           | 1 | 1 | 1.00 | 0.00 | 0.00 | 1 |
| 0.00 | 1 Dammam    | 3 | 1 | 1.00 | 0.00 | 0.00 | 1 |
| 0.00 | 1           | 4 | 1 | 1.00 | 0.00 | 0.00 | 1 |
| 0.00 | 1 Dammam    | 1 | 1 | 1.00 | 0.00 | 0.00 | 1 |
| 1.00 | 1           | 1 | 1 | 1.00 | 0.00 | 0.00 | 1 |
| 0.00 | 1           | 2 | 1 | 1.00 | 0.00 | 0.00 | 1 |
| 1.00 | 1 Dammam    | 3 | 1 | 1.00 | 0.00 | 0.00 | 1 |
| 0.00 | 1 Dammam    | 2 | 1 | 1.00 | 0.00 | 0.00 | 1 |
| 0.00 | 1 Alrafya   | 1 | 1 | 1.00 | 0.00 | 0.00 | 1 |
| 0.00 | 1 Dammam    | 4 | 1 | 1.00 | 0.00 | 0.00 | 1 |
| 0.00 | 1 Alkhobar  | 3 | 1 | 1.00 | 0.00 | 0.00 | 1 |
| 0.00 | 1 Dammam    | 1 | 1 | 1.00 | 0.00 | 0.00 | 1 |
| 0.00 | 1 Dammam    | 1 | 3 | 0.00 | 0.00 | 1.00 | 1 |
| 1.00 | 1 Dammam    | 1 | 1 | 1.00 | 0.00 | 0.00 | 1 |
| 0.00 | 1 Saihat    | 1 | 1 | 1.00 | 0.00 | 0.00 | 1 |
| 0.00 | 1 Dammam    | 2 | 1 | 1.00 | 0.00 | 0.00 | 1 |
| 0.00 | 1 Dammam    | 2 | 1 | 1.00 | 0.00 | 0.00 | 1 |
| 0.00 | 1 Dammam    | 3 | 1 | 1.00 | 0.00 | 0.00 | 1 |
| 0.00 | 1 Dammam    | 2 | 1 | 1.00 | 0.00 | 0.00 | 1 |
| 0.00 | 1 Dammam    | 2 | 1 | 1.00 | 0.00 | 0.00 | 1 |
| 0.00 | 1           | 4 | 1 | 1.00 | 0.00 | 0.00 | 1 |
| 0.00 | 1 Alsafwa   | 2 | 1 | 1.00 | 0.00 | 0.00 | 1 |

| hour_grp_1 | hour_grp_2 | Leave_job | Pay_dimer | Promotion | supervisor | Rewards_c | Procedure: | Coworkers |
|------------|------------|-----------|-----------|-----------|------------|-----------|------------|-----------|
| 0.00       | 1.00       | 2         | 8         | 10        | 19         | 4         | 8          | 11        |
| 1.00       | 0.00       | 2         | 4         | 8         | 22         | 3         | 6          | 10        |
| 1.00       | 0.00       | 1         | 2         | 6         | 10         | 2         | 4          | 15        |
| 1.00       | 0.00       | 2         | 10        | 10        | 22         | 5         | 10         | 12        |
| 1.00       | 0.00       | 2         | 8         | 7         | 15         | 4         | 8          | 9         |
| 1.00       | 0.00       | 2         | 9         | 7         | 12         | 2         | 7          | 9         |
| 1.00       | 0.00       | 2         | 4         | 6         | 17         | 4         | 4          | 11        |
| 1.00       | 0.00       | 2         | 8         | 9         | 22         | 4         | 6          | 11        |
| 1.00       | 0.00       | 2         | 5         | 7         | 20         | 4         | 8          | 11        |
| 1.00       | 0.00       | 2         | 7         | 6         | 20         | 4         | 6          | 12        |
| 1.00       | 0.00       | 2         | 6         | 5         | 22         | 4         | 6          | 14        |
| 1.00       | 0.00       | 2         | 6         | 8         | 17         | 4         | 8          | 13        |
| 1.00       | 0.00       | 1         | 6         | 7         | 15         | 3         | 4          | 7         |
| 1.00       | 0.00       | 1         | 4         | 3         | 12         | 1         | 4          | 11        |
| 1.00       | 0.00       | 2         | 5         | 6         | 15         | 4         | 7          | 10        |
| 1.00       | 0.00       | 1         | 6         | 5         | 17         | 4         | 8          | 10        |
| 1.00       | 0.00       | 1         | 9         | 8         | 15         | 3         | 6          | 7         |
| 1.00       | 0.00       | 2         | 7         | 8         | 18         | 4         | 8          | 8         |
| 1.00       | 0.00       | 2         | 8         | 8         | 14         | 3         | 6          | 9         |
| 1.00       | 0.00       | 1         | 4         | 2         | 6          | 1         | 2          | 3         |
| 1.00       | 0.00       | 1         | 7         | 7         | 17         | 4         | 8          | 8         |
| 1.00       | 0.00       | 1         | 7         | 6         | 15         | 4         | 4          | 10        |
| 1.00       | 0.00       | 1         | 7         | 8         | 18         | 4         | 7          | 12        |
| 1.00       | 0.00       | 2         | 9         | 8         | 20         | 3         | 6          | 9         |
| 1.00       | 0.00       | 1         | 3         | 4         | 12         | 3         | 3          | 10        |
| 1.00       | 0.00       | 1         | 8         | 8         | 18         | 4         | 6          | 10        |
| 1.00       | 0.00       | 1         | 4         | 2         | 11         | 3         | 4          | 8         |
| 1.00       | 0.00       | 2         | 2         | 6         | 9          | 1         | 2          | 13        |
| 1.00       | 0.00       | 1         | 4         | 4         | 16         | 3         | 6          | 11        |
| 1.00       | 0.00       | 2         | 5         | 6         | 14         | 3         | 6          | 8         |
| 1.00       | 0.00       | 2         | 7         | 7         | 22         | 4         | 8          | 10        |
| 1.00       | 0.00       | 2         | 7         | 8         | 13         | 3         | 8          | 9         |
| 1.00       | 0.00       | 1         | 4         | 5         | 8          | 2         | 4          | 8         |
| 1.00       | 0.00       | 1         | 6         | 8         | 15         | 2         | 3          | 10        |
| 1.00       | 0.00       | 1         | 3         | 4         | 18         | 3         | 7          | 14        |
| 1.00       | 0.00       | 2         | 6         | 7         | 17         | 2         | 6          | 11        |
| 1.00       | 0.00       | 1         | 7         | 7         | 16         | 3         | 4          | 10        |
| 1.00       | 0.00       | 1         | 3         | 7         | 19         | 4         | 4          | 9         |
| 1.00       | 0.00       | 2         | 8         | 8         | 24         | 5         | 10         | 13        |
| 1.00       | 0.00       | 2         | 9         | 10        | 22         | 4         | 5          | 12        |
| 1.00       | 0.00       | 2         | 8         | 8         | 23         | 4         | 10         | 7         |
| 1.00       | 0.00       | 2         | 8         | 8         | 18         | 5         | 6          | 11        |
| 1.00       | 0.00       | 2         | 8         | 8         | 20         | 4         | 8          | 10        |
| 1.00       | 0.00       | 1         | 7         | 6         | 19         | 3         | 6          | 13        |
| 1.00       | 0.00       | 2         | 3         | 5         | 12         | 2         | 4          | 8         |
| 1.00       | 0.00       | 1         | 5         | 7         | 10         | 1         | 4          | 13        |
| 1.00       | 0.00       | 1         | 5         | 6         | 10         | 1         | 3          | 9         |
| 1.00       | 0.00       | 2         | 5         | 6         | 18         | 2         | 3          | 9         |
| 1.00       | 0.00       | 1         | 7         | 8         | 12         | 2         | 4          | 10        |

|      |      |   |    |    |    |   |    |    |
|------|------|---|----|----|----|---|----|----|
| 1.00 | 0.00 | 1 | 5  | 5  | 5  | 1 | 2  | 5  |
| 1.00 | 0.00 | 2 | 7  | 7  | 21 | 4 | 8  | 11 |
| 1.00 | 0.00 | 1 | 7  | 6  | 14 | 2 | 6  | 8  |
| 1.00 | 0.00 | 2 | 8  | 8  | 13 | 3 | 4  | 11 |
| 1.00 | 0.00 | 2 | 6  | 7  | 20 | 4 | 9  | 11 |
| 1.00 | 0.00 | 1 | 4  | 6  | 10 | 2 | 5  | 7  |
| 1.00 | 0.00 | 1 | 3  | 3  | 14 | 2 | 4  | 10 |
| 1.00 | 0.00 | 1 | 3  | 4  | 16 | 3 | 5  | 11 |
| 1.00 | 0.00 | 2 | 8  | 10 | 21 | 4 | 9  | 9  |
| 1.00 | 0.00 | 2 | 10 | 10 | 25 | 5 | 10 | 12 |
| 1.00 | 0.00 | 2 | 8  | 7  | 14 | 3 | 5  | 9  |
| 0.00 | 1.00 | 1 | 2  | 3  | 10 | 1 | 5  | 11 |
| 1.00 | 0.00 | 2 | 6  | 8  | 23 | 5 | 8  | 9  |
| 1.00 | 0.00 | 1 | 6  | 8  | 11 | 3 | 6  | 5  |
| 1.00 | 0.00 | 2 | 3  | 4  | 18 | 2 | 7  | 9  |
| 1.00 | 0.00 | 2 | 7  | 2  | 21 | 4 | 6  | 9  |
| 1.00 | 0.00 | 1 | 6  | 6  | 15 | 3 | 6  | 9  |
| 1.00 | 0.00 | 2 | 6  | 6  | 17 | 3 | 7  | 10 |
| 1.00 | 0.00 | 2 | 8  | 8  | 20 | 4 | 8  | 10 |
| 1.00 | 0.00 | 2 | 7  | 5  | 18 | 3 | 7  | 11 |
| 1.00 | 0.00 | 2 | 6  | 5  | 21 | 5 | 10 | 13 |
| 1.00 | 0.00 | 2 | 6  | 10 | 19 | 5 | 7  | 6  |
| 1.00 | 0.00 | 2 | 6  | 6  | 17 | 3 | 6  | 11 |
| 1.00 | 0.00 | 2 | 5  | 8  | 20 | 4 | 8  | 13 |
| 1.00 | 0.00 | 2 | 7  | 6  | 15 | 4 | 4  | 8  |
| 1.00 | 0.00 | 2 | 6  | 7  | 17 | 5 | 8  | 10 |
| 1.00 | 0.00 | 2 | 7  | 3  | 8  | 2 | 7  | 4  |
| 1.00 | 0.00 | 1 | 2  | 5  | 14 | 4 | 6  | 13 |
| 1.00 | 0.00 | 2 | 5  | 5  | 19 | 4 | 8  | 8  |
| 1.00 | 0.00 | 2 | 6  | 10 | 19 | 3 | 6  | 7  |
| 1.00 | 0.00 | 1 | 6  | 6  | 13 | 1 | 6  | 8  |
| 1.00 | 0.00 | 1 | 4  | 3  | 19 | 4 | 6  | 7  |
| 1.00 | 0.00 | 2 | 9  | 10 | 23 | 5 | 10 | 12 |
| 1.00 | 0.00 | 1 | 9  | 6  | 18 | 3 | 4  | 8  |
| 1.00 | 0.00 | 2 | 7  | 8  | 18 | 3 | 8  | 8  |
| 1.00 | 0.00 | 2 | 8  | 10 | 19 | 2 | 7  | 10 |
| 1.00 | 0.00 | 1 | 6  | 3  | 14 | 3 | 5  | 8  |
| 1.00 | 0.00 | 2 | 8  | 6  | 15 | 3 | 5  | 9  |
| 1.00 | 0.00 | 1 | 7  | 6  | 15 | 3 | 6  | 9  |
| 1.00 | 0.00 | 1 | 5  | 5  | 9  | 2 | 5  | 5  |
| 1.00 | 0.00 | 2 | 7  | 5  | 13 | 2 | 4  | 7  |
| 1.00 | 0.00 | 1 | 8  | 5  | 17 | 4 | 7  | 9  |
| 1.00 | 0.00 | 2 | 8  | 5  | 15 | 2 | 8  | 9  |
| 1.00 | 0.00 | 1 | 4  | 9  | 13 | 2 | 8  | 8  |
| 1.00 | 0.00 | 2 | 6  | 5  | 20 | 4 | 8  | 12 |
| 1.00 | 0.00 | 1 | 8  | 6  | 10 | 3 | 4  | 9  |
| 1.00 | 0.00 | 2 | 10 | 10 | 15 | 5 | 6  | 9  |
| 1.00 | 0.00 | 1 | 2  | 3  | 12 | 3 | 3  | 6  |
| 1.00 | 0.00 | 1 | 7  | 4  | 10 | 3 | 3  | 5  |
| 1.00 | 0.00 | 1 | 8  | 5  | 10 | 1 | 4  | 7  |

|      |      |   |    |    |    |   |    |    |
|------|------|---|----|----|----|---|----|----|
| 1.00 | 0.00 | 2 | 4  | 4  | 16 | 3 | 8  | 8  |
| 1.00 | 0.00 | 1 | 4  | 3  | 17 | 4 | 4  | 10 |
| 1.00 | 0.00 | 1 | 8  | 3  | 10 | 2 | 6  | 4  |
| 1.00 | 0.00 | 1 | 6  | 4  | 14 | 3 | 5  | 9  |
| 1.00 | 0.00 | 2 | 8  | 5  | 19 | 4 | 9  | 6  |
| 1.00 | 0.00 | 2 | 8  | 3  | 20 | 4 | 7  | 10 |
| 1.00 | 0.00 | 2 | 8  | 8  | 19 | 3 | 7  | 11 |
| 1.00 | 0.00 | 1 | 6  | 6  | 17 | 5 | 6  | 7  |
| 1.00 | 0.00 | 1 | 4  | 3  | 17 | 3 | 6  | 10 |
| 1.00 | 0.00 | 1 | 8  | 5  | 12 | 3 | 4  | 8  |
| 1.00 | 0.00 | 2 | 6  | 8  | 20 | 4 | 8  | 10 |
| 1.00 | 0.00 | 2 | 7  | 7  | 23 | 3 | 10 | 11 |
| 1.00 | 0.00 | 2 | 5  | 4  | 17 | 4 | 8  | 11 |
| 1.00 | 0.00 | 2 | 8  | 5  | 16 | 2 | 7  | 10 |
| 1.00 | 0.00 | 2 | 7  | 5  | 17 | 3 | 8  | 9  |
| 1.00 | 0.00 | 1 | 7  | 8  | 14 | 2 | 4  | 9  |
| 1.00 | 0.00 | 1 | 10 | 10 | 25 | 5 | 10 | 7  |
| 1.00 | 0.00 | 1 | 6  | 6  | 18 | 4 | 7  | 10 |
| 1.00 | 0.00 | 1 | 8  | 5  | 7  | 1 | 3  | 7  |
| 1.00 | 0.00 | 1 | 7  | 4  | 13 | 4 | 5  | 11 |
| 1.00 | 0.00 | 2 | 4  | 3  | 7  | 1 | 8  | 7  |
| 1.00 | 0.00 | 2 | 7  | 4  | 15 | 2 | 4  | 10 |
| 1.00 | 0.00 | 1 | 3  | 6  | 15 | 2 | 8  | 13 |
| 1.00 | 0.00 | 1 | 8  | 4  | 18 | 4 | 7  | 12 |
| 1.00 | 0.00 | 2 | 7  | 5  | 24 | 4 | 10 | 10 |
| 1.00 | 0.00 | 1 | 9  | 10 | 14 | 2 | 8  | 8  |
| 1.00 | 0.00 | 1 | 6  | 8  | 17 | 4 | 8  | 10 |
| 1.00 | 0.00 | 1 | 5  | 6  | 17 | 3 | 6  | 11 |
| 1.00 | 0.00 | 1 | 8  | 4  | 11 | 1 | 5  | 9  |
| 1.00 | 0.00 | 2 | 6  | 6  | 20 | 4 | 8  | 10 |
| 1.00 | 0.00 | 2 | 8  | 7  | 24 | 5 | 10 | 11 |
| 1.00 | 0.00 | 1 | 2  | 2  | 7  | 1 | 5  | 7  |
| 1.00 | 0.00 | 1 | 3  | 2  | 19 | 4 | 7  | 13 |
| 1.00 | 0.00 | 2 | 6  | 4  | 20 | 4 | 8  | 13 |
| 1.00 | 0.00 | 2 | 6  | 9  | 20 | 5 | 10 | 7  |
| 1.00 | 0.00 | 2 | 6  | 3  | 12 | 2 | 3  | 6  |
| 1.00 | 0.00 | 2 | 4  | 4  | 10 | 2 | 4  | 8  |
| 1.00 | 0.00 | 2 | 6  | 5  | 21 | 5 | 9  | 9  |
| 1.00 | 0.00 | 2 | 8  | 7  | 20 | 4 | 7  | 11 |
| 1.00 | 0.00 | 1 | 6  | 4  | 9  | 1 | 5  | 10 |
| 1.00 | 0.00 | 2 | 4  | 4  | 11 | 2 | 3  | 7  |
| 1.00 | 0.00 | 1 | 3  | 3  | 11 | 2 | 2  | 6  |
| 1.00 | 0.00 | 2 | 9  | 5  | 22 | 4 | 9  | 11 |
| 1.00 | 0.00 | 1 | 6  | 3  | 11 | 1 | 2  | 6  |

Communic Responsibi Patient\_dir Social\_dim Work\_dim Total\_Satisfaction

|   |    |    |    |    |     |
|---|----|----|----|----|-----|
| 3 | 6  | 16 | 9  | 18 | 112 |
| 5 | 10 | 15 | 7  | 19 | 109 |
| 4 | 10 | 13 | 2  | 6  | 74  |
| 5 | 10 | 19 | 10 | 19 | 132 |
| 4 | 8  | 14 | 5  | 14 | 96  |
| 4 | 10 | 12 | 9  | 19 | 100 |
| 4 | 8  | 16 | 8  | 21 | 103 |
| 4 | 8  | 16 | 7  | 16 | 111 |
| 4 | 8  | 15 | 8  | 17 | 107 |
| 4 | 8  | 9  | 6  | 19 | 101 |
| 4 | 10 | 11 | 7  | 21 | 110 |
| 4 | 8  | 20 | 8  | 18 | 114 |
| 2 | 8  | 14 | 4  | 16 | 86  |
| 3 | 6  | 10 | 7  | 15 | 76  |
| 2 | 8  | 13 | 6  | 16 | 92  |
| 4 | 8  | 14 | 6  | 17 | 99  |
| 5 | 10 | 14 | 6  | 14 | 97  |
| 3 | 7  | 15 | 8  | 17 | 103 |
| 4 | 9  | 15 | 5  | 13 | 94  |
| 3 | 8  | 10 | 3  | 7  | 49  |
| 3 | 8  | 16 | 6  | 16 | 100 |
| 4 | 8  | 12 | 9  | 15 | 94  |
| 5 | 9  | 13 | 8  | 16 | 107 |
| 3 | 6  | 12 | 6  | 15 | 97  |
| 2 | 5  | 9  | 8  | 18 | 77  |
| 3 | 7  | 13 | 5  | 13 | 95  |
| 1 | 7  | 10 | 3  | 12 | 65  |
| 1 | 6  | 8  | 2  | 12 | 62  |
| 2 | 9  | 12 | 4  | 15 | 86  |
| 1 | 8  | 11 | 3  | 13 | 78  |
| 4 | 7  | 15 | 7  | 18 | 109 |
| 2 | 8  | 14 | 6  | 15 | 93  |
| 2 | 6  | 12 | 4  | 6  | 61  |
| 2 | 7  | 12 | 4  | 10 | 79  |
| 1 | 9  | 16 | 9  | 18 | 102 |
| 4 | 8  | 10 | 5  | 13 | 89  |
| 3 | 7  | 11 | 4  | 11 | 83  |
| 5 | 7  | 12 | 5  | 12 | 87  |
| 5 | 10 | 19 | 9  | 20 | 131 |
| 4 | 8  | 16 | 6  | 19 | 115 |
| 5 | 10 | 18 | 10 | 17 | 120 |
| 3 | 9  | 17 | 6  | 17 | 108 |
| 3 | 9  | 14 | 8  | 17 | 109 |
| 4 | 10 | 15 | 7  | 19 | 109 |
| 2 | 8  | 11 | 4  | 13 | 72  |
| 4 | 10 | 11 | 6  | 12 | 83  |
| 4 | 9  | 10 | 4  | 10 | 71  |
| 1 | 10 | 9  | 5  | 15 | 83  |
| 2 | 7  | 14 | 2  | 12 | 80  |

|   |    |    |    |    |     |
|---|----|----|----|----|-----|
| 1 | 9  | 6  | 2  | 6  | 47  |
| 4 | 10 | 16 | 9  | 20 | 117 |
| 3 | 7  | 14 | 6  | 15 | 88  |
| 3 | 7  | 12 | 4  | 13 | 86  |
| 5 | 10 | 15 | 8  | 20 | 115 |
| 3 | 8  | 16 | 6  | 18 | 85  |
| 3 | 8  | 15 | 5  | 18 | 85  |
| 4 | 7  | 13 | 4  | 16 | 86  |
| 5 | 10 | 19 | 10 | 20 | 125 |
| 5 | 10 | 19 | 9  | 21 | 136 |
| 2 | 8  | 13 | 8  | 17 | 94  |
| 4 | 5  | 5  | 4  | 11 | 61  |
| 5 | 8  | 18 | 8  | 17 | 115 |
| 2 | 8  | 15 | 4  | 15 | 83  |
| 3 | 9  | 6  | 8  | 22 | 91  |
| 4 | 9  | 15 | 8  | 19 | 104 |
| 3 | 6  | 12 | 6  | 15 | 87  |
| 4 | 9  | 13 | 8  | 15 | 98  |
| 4 | 8  | 15 | 8  | 18 | 111 |
| 4 | 7  | 12 | 6  | 17 | 97  |
| 4 | 8  | 14 | 8  | 17 | 111 |
| 4 | 7  | 13 | 6  | 17 | 100 |
| 3 | 6  | 11 | 6  | 17 | 92  |
| 4 | 9  | 16 | 8  | 20 | 115 |
| 3 | 10 | 6  | 3  | 14 | 80  |
| 4 | 8  | 13 | 6  | 19 | 103 |
| 4 | 8  | 13 | 6  | 14 | 76  |
| 4 | 8  | 14 | 4  | 16 | 90  |
| 4 | 8  | 13 | 6  | 15 | 95  |
| 3 | 7  | 13 | 6  | 16 | 96  |
| 4 | 8  | 16 | 3  | 9  | 80  |
| 5 | 9  | 16 | 7  | 17 | 97  |
| 5 | 10 | 16 | 9  | 22 | 131 |
| 3 | 9  | 13 | 4  | 15 | 92  |
| 4 | 8  | 16 | 7  | 19 | 106 |
| 4 | 8  | 16 | 7  | 22 | 113 |
| 4 | 8  | 10 | 5  | 13 | 79  |
| 4 | 7  | 12 | 6  | 15 | 90  |
| 3 | 6  | 12 | 6  | 13 | 86  |
| 1 | 10 | 9  | 5  | 14 | 70  |
| 3 | 9  | 12 | 6  | 15 | 83  |
| 4 | 8  | 15 | 8  | 18 | 103 |
| 4 | 8  | 16 | 5  | 18 | 98  |
| 4 | 6  | 15 | 9  | 12 | 90  |
| 4 | 8  | 16 | 8  | 20 | 111 |
| 1 | 7  | 2  | 2  | 11 | 63  |
| 2 | 8  | 16 | 8  | 19 | 108 |
| 2 | 8  | 12 | 4  | 11 | 66  |
| 2 | 9  | 13 | 5  | 15 | 76  |
| 2 | 6  | 10 | 4  | 12 | 69  |

|   |    |    |    |    |     |
|---|----|----|----|----|-----|
| 4 | 8  | 12 | 7  | 18 | 92  |
| 4 | 8  | 10 | 5  | 14 | 83  |
| 5 | 10 | 10 | 6  | 13 | 77  |
| 1 | 5  | 12 | 6  | 16 | 81  |
| 5 | 10 | 17 | 5  | 20 | 108 |
| 4 | 8  | 14 | 8  | 16 | 102 |
| 3 | 7  | 16 | 6  | 17 | 105 |
| 3 | 7  | 12 | 8  | 15 | 92  |
| 4 | 7  | 11 | 4  | 17 | 86  |
| 4 | 8  | 16 | 6  | 17 | 91  |
| 4 | 8  | 16 | 8  | 20 | 112 |
| 5 | 10 | 17 | 8  | 20 | 121 |
| 4 | 8  | 12 | 8  | 18 | 99  |
| 4 | 7  | 13 | 8  | 21 | 101 |
| 3 | 9  | 14 | 6  | 18 | 99  |
| 2 | 8  | 14 | 7  | 18 | 93  |
| 5 | 10 | 20 | 10 | 21 | 133 |
| 4 | 8  | 15 | 6  | 16 | 100 |
| 2 | 7  | 12 | 4  | 9  | 65  |
| 3 | 8  | 13 | 7  | 16 | 91  |
| 4 | 7  | 12 | 7  | 13 | 73  |
| 4 | 8  | 15 | 6  | 16 | 91  |
| 5 | 10 | 14 | 7  | 14 | 97  |
| 4 | 7  | 15 | 6  | 19 | 104 |
| 5 | 10 | 17 | 10 | 20 | 122 |
| 4 | 8  | 16 | 9  | 16 | 104 |
| 4 | 7  | 14 | 8  | 14 | 100 |
| 3 | 6  | 12 | 7  | 16 | 92  |
| 2 | 9  | 13 | 2  | 12 | 76  |
| 4 | 8  | 15 | 7  | 17 | 105 |
| 4 | 7  | 16 | 9  | 19 | 120 |
| 1 | 5  | 8  | 2  | 9  | 49  |
| 4 | 8  | 16 | 5  | 15 | 96  |
| 4 | 9  | 3  | 7  | 20 | 98  |
| 5 | 10 | 14 | 5  | 16 | 107 |
| 4 | 6  | 10 | 5  | 15 | 72  |
| 3 | 6  | 7  | 4  | 12 | 64  |
| 4 | 7  | 17 | 8  | 19 | 110 |
| 4 | 8  | 16 | 7  | 18 | 110 |
| 2 | 5  | 8  | 3  | 8  | 61  |
| 2 | 6  | 2  | 2  | 10 | 53  |
| 1 | 8  | 6  | 3  | 5  | 50  |
| 5 | 7  | 16 | 8  | 21 | 117 |
| 3 | 9  | 14 | 2  | 12 | 69  |
